# Supplementary material
Source: ML conference proceedings conference paper supplement (https://openreview.net/forum?id=s6cyuoLbZLU)

original

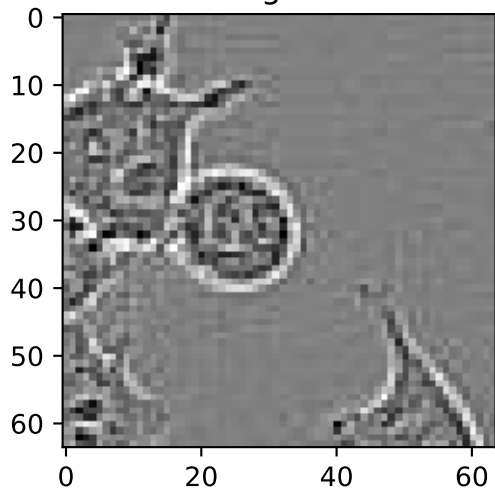

reconstruction

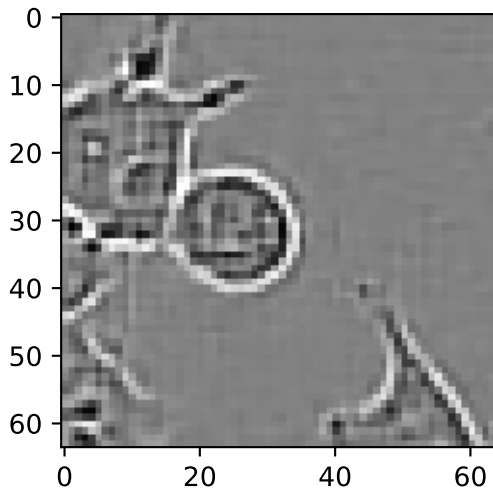

Supplement: supplementary_material [file attachment]

original

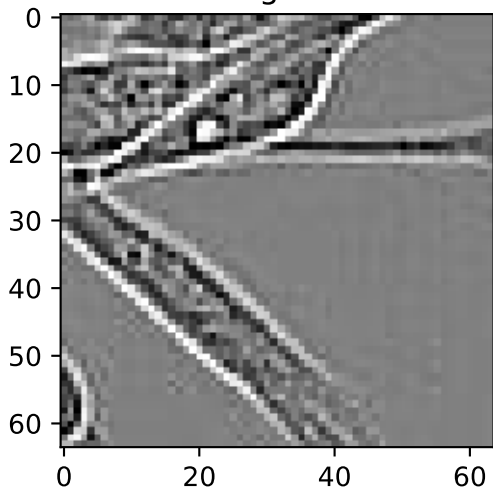

reconstruction

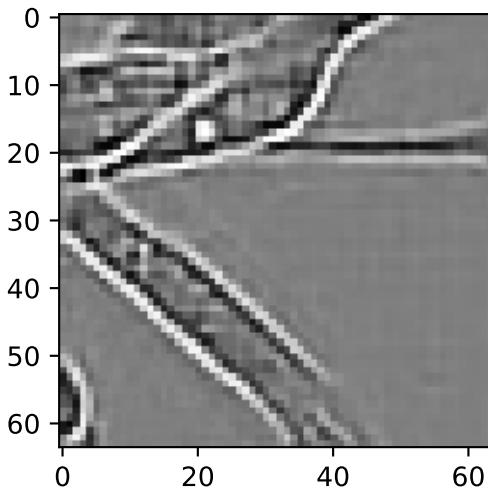

Supplement: supplementary_material [file attachment]

original

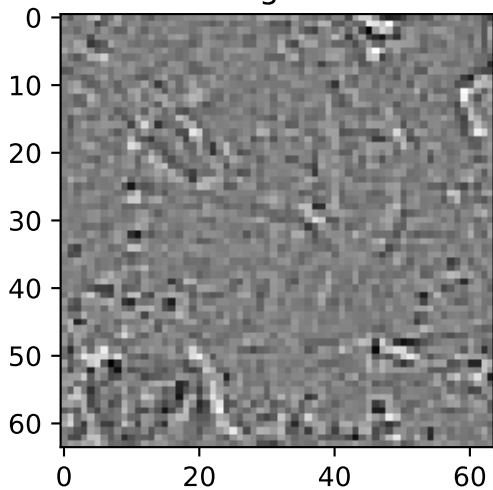

reconstruction

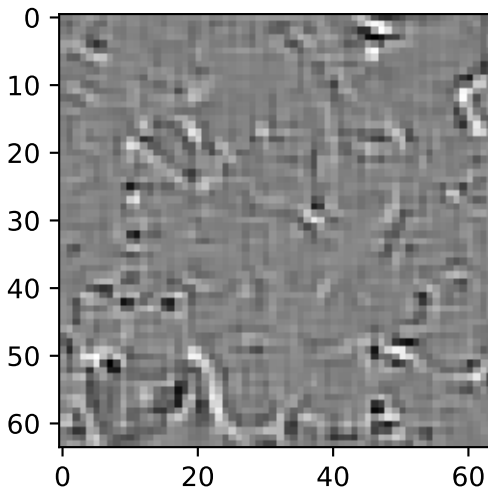

Supplement: supplementary_material [file attachment]

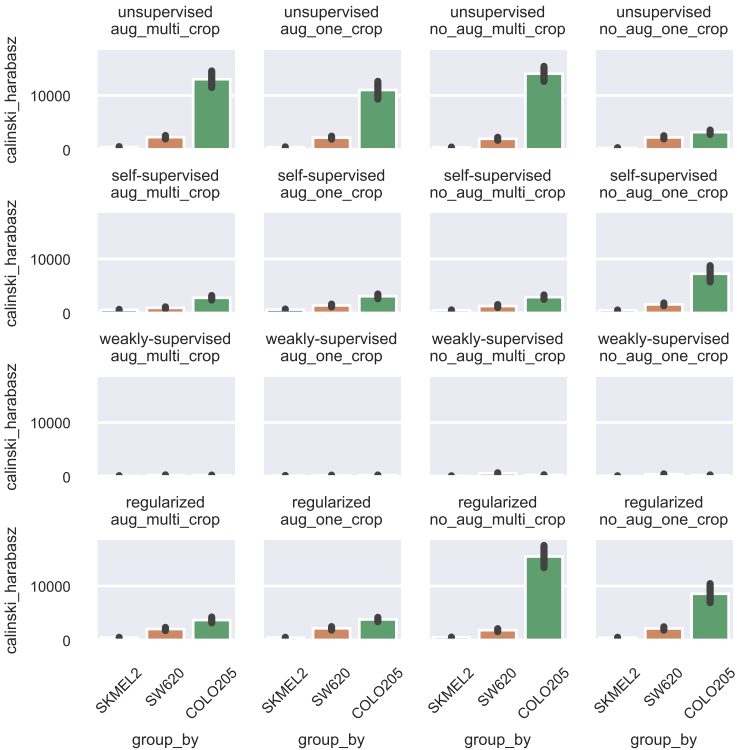

Supplement: supplementary_material [file attachment]

original

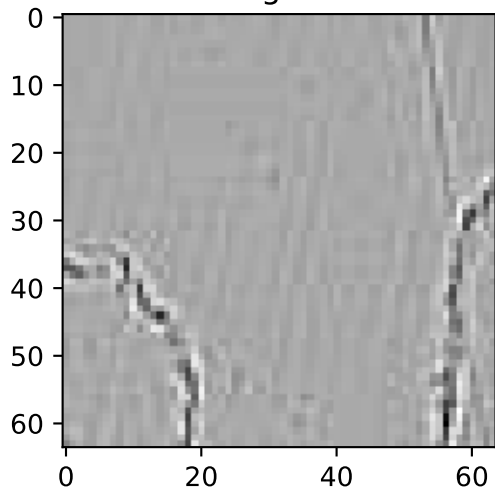

reconstruction

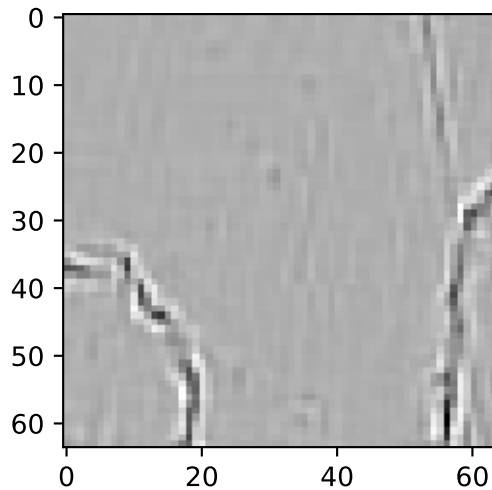

Supplement: supplementary_material [file attachment]

original

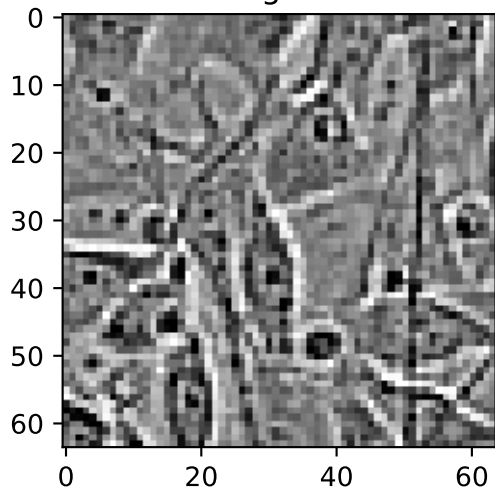

reconstruction

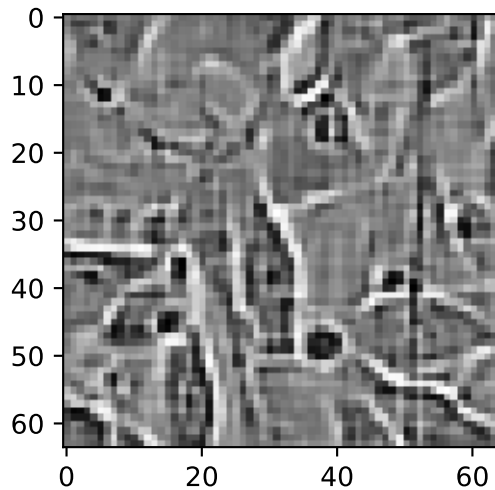

Supplement: supplementary_material [file attachment]

original

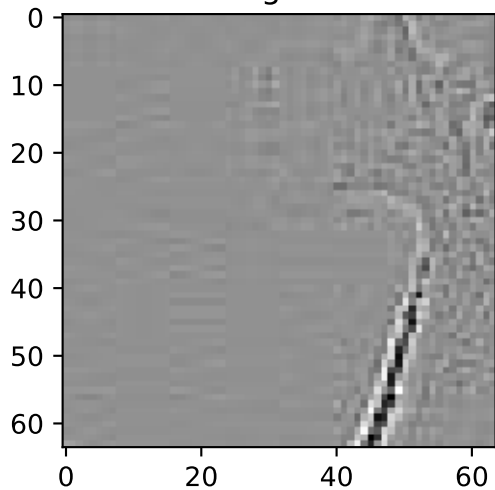

reconstruction

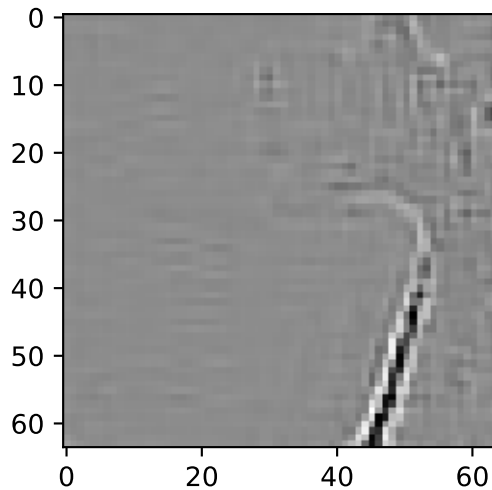

Supplement: supplementary_material [file attachment]

original

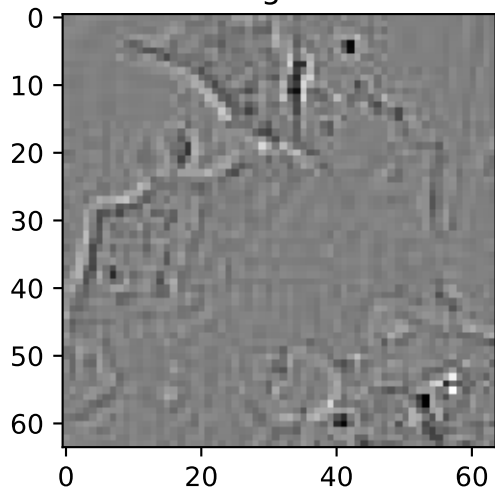

reconstruction

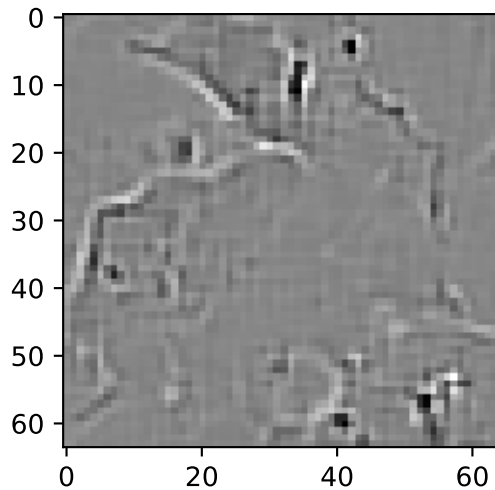

Supplement: supplementary_material [file attachment]

original

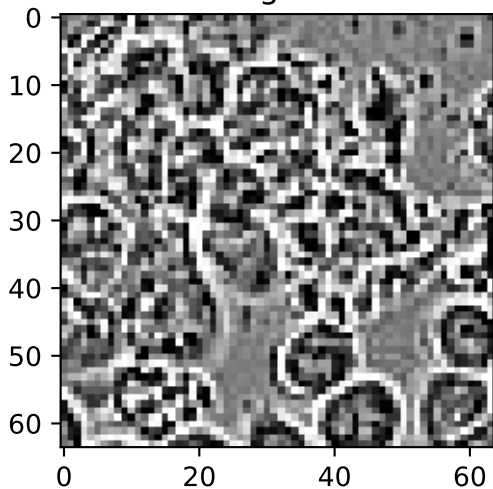

reconstruction

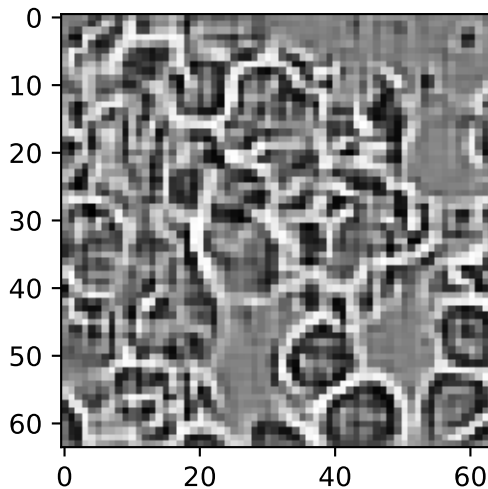

Supplement: supplementary_material [file attachment]

original

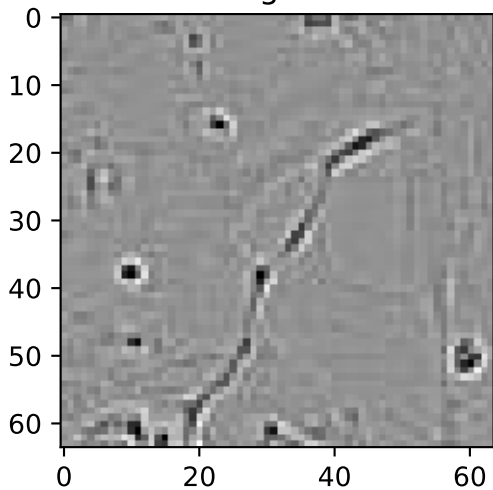

reconstruction

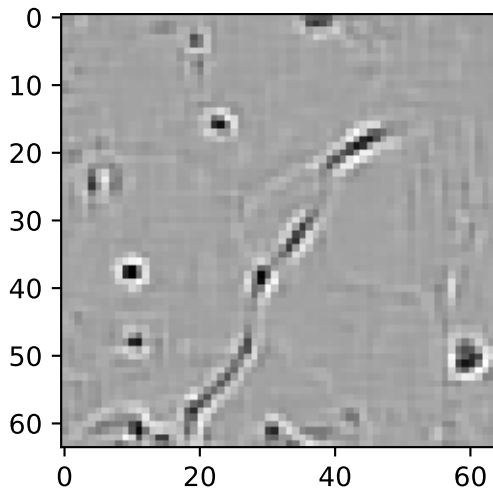

Supplement: supplementary_material [file attachment]

original

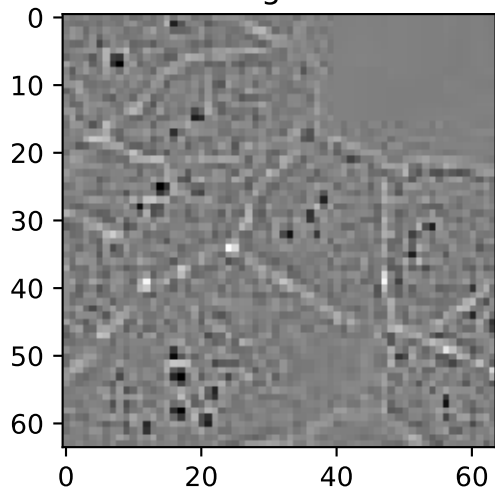

reconstruction

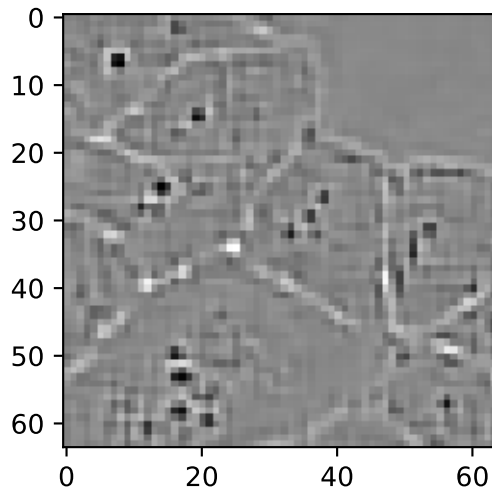

Supplement: supplementary_material [file attachment]

original

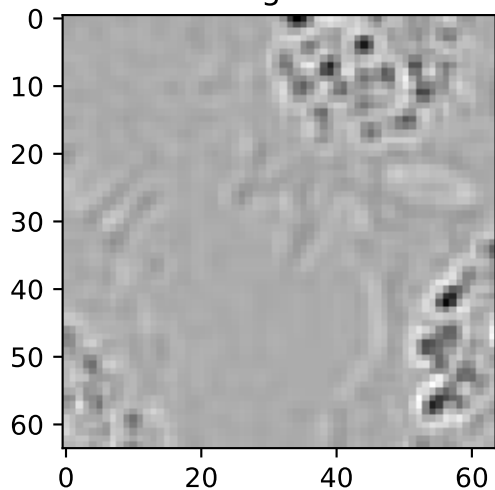

reconstruction

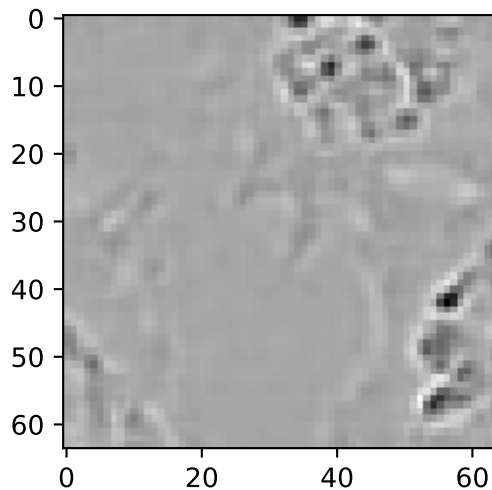

Supplement: supplementary_material [file attachment]

original

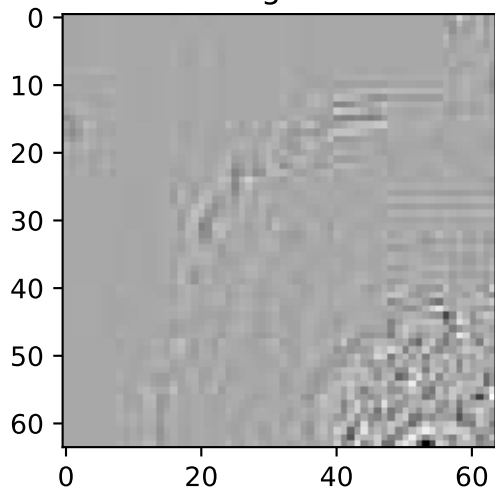

reconstruction

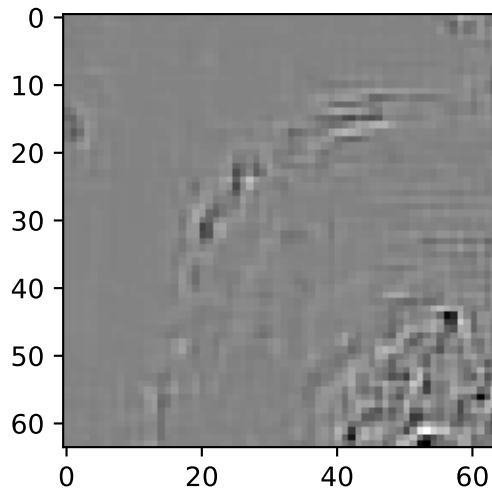

Supplement: supplementary_material [file attachment]

original

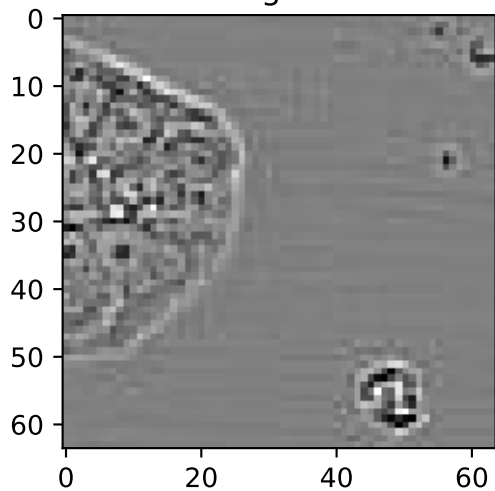

reconstruction

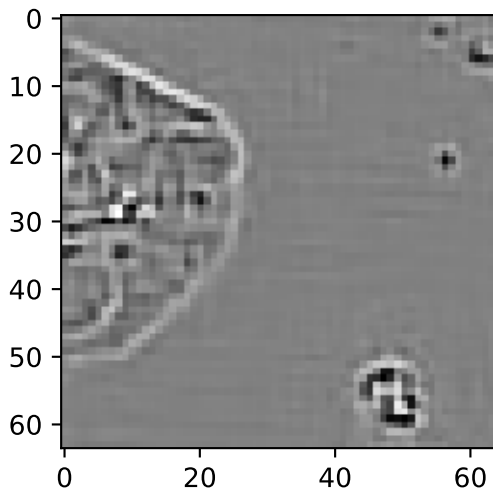

Supplement: supplementary_material [file attachment]

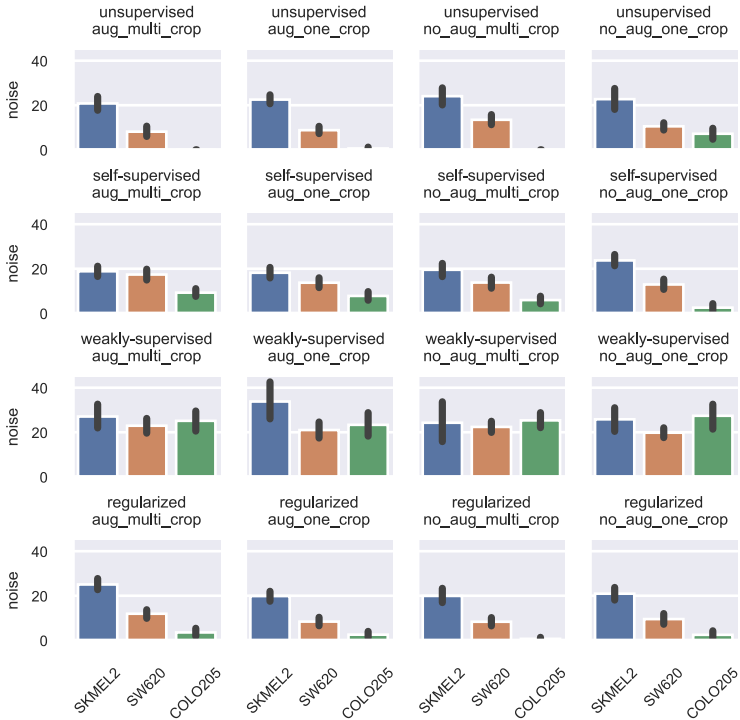

Supplement: supplementary_material [file attachment]

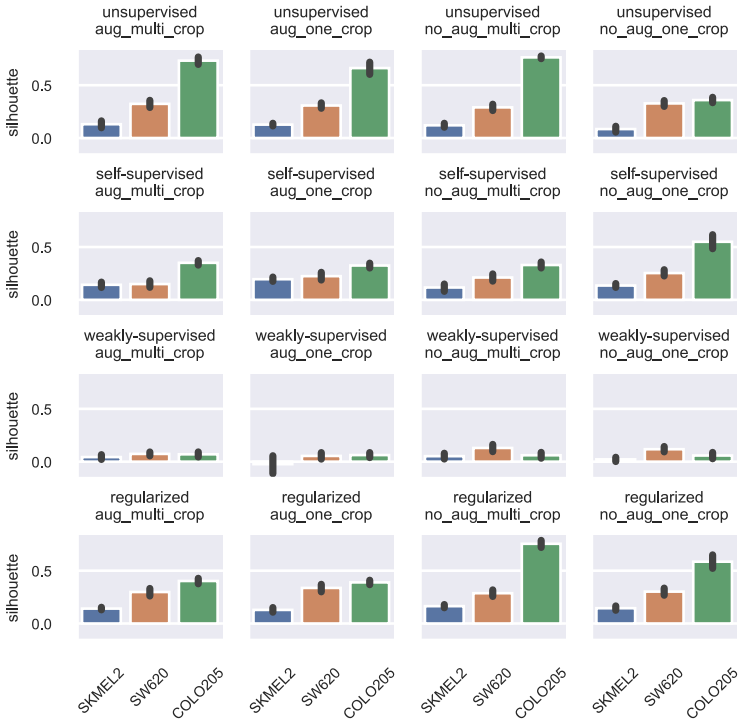

Supplement: supplementary_material [file attachment]

original

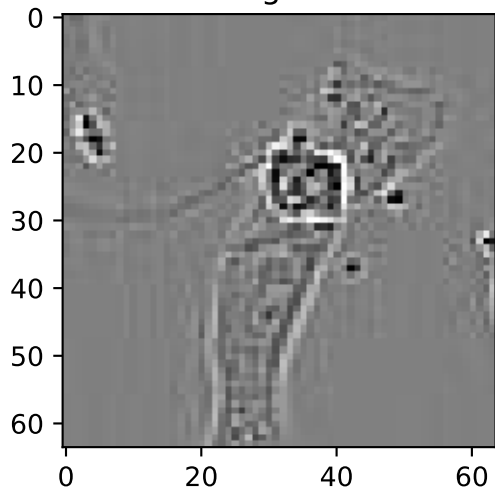

reconstruction

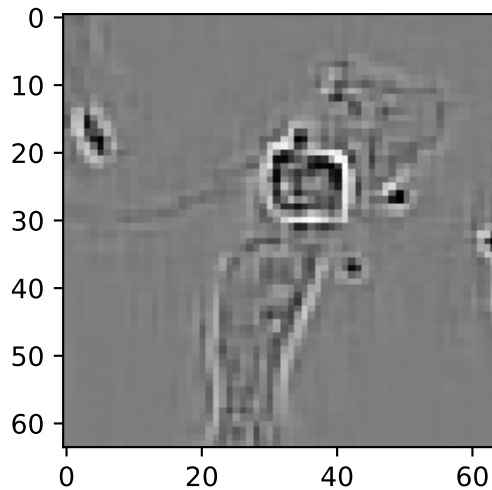

Supplement: supplementary_material [file attachment]

original

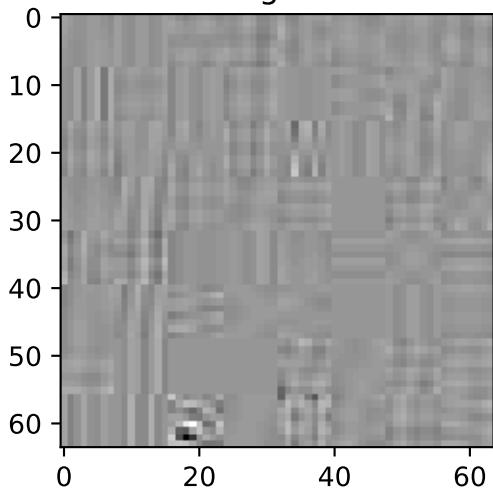

reconstruction

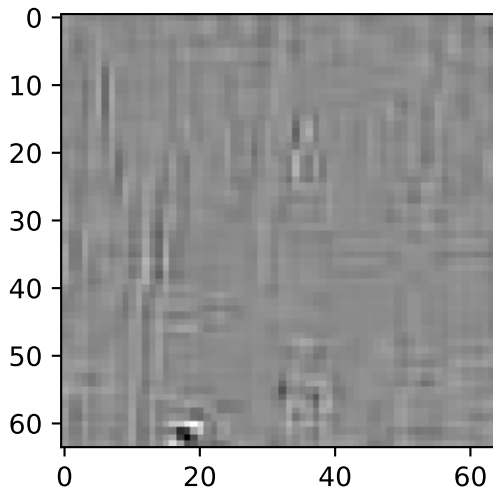

Supplement: supplementary_material [file attachment]

original

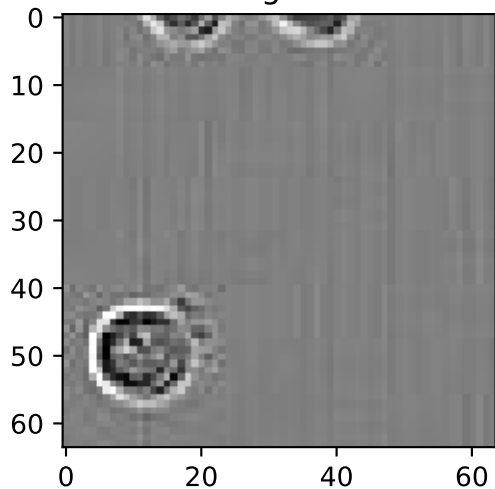

reconstruction

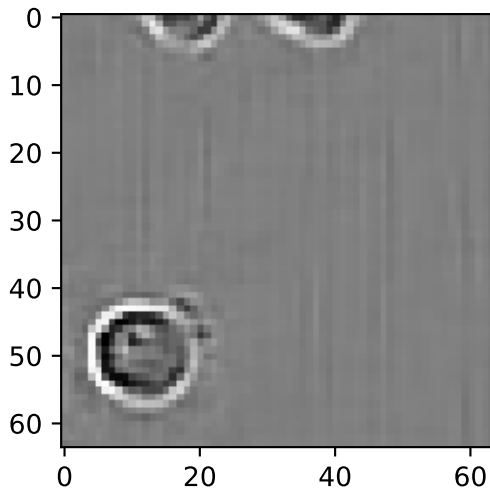

Supplement: supplementary_material [file attachment]

original

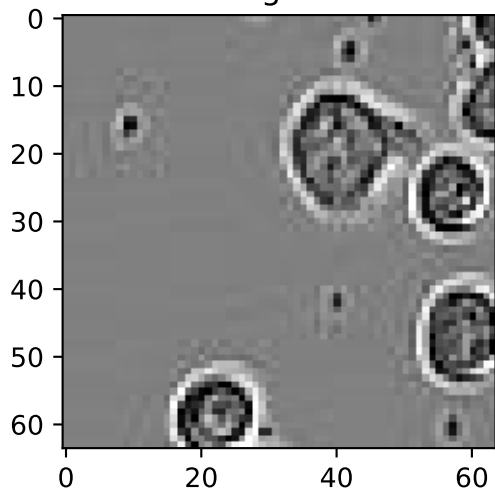

reconstruction

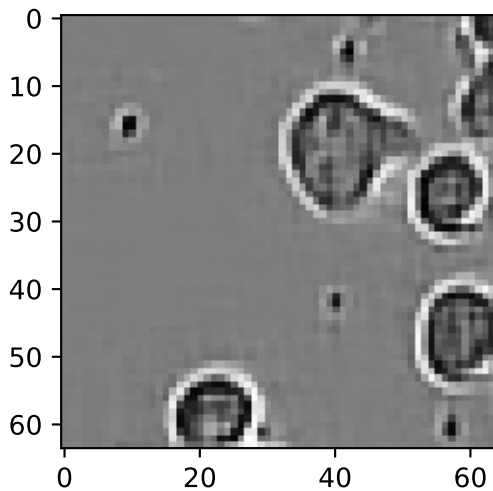

Supplement: supplementary_material [file attachment]

original

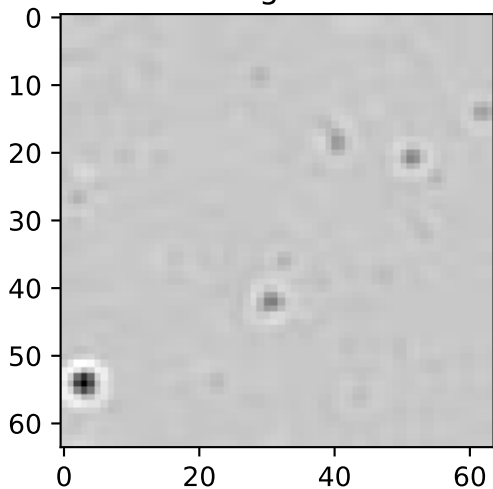

reconstruction

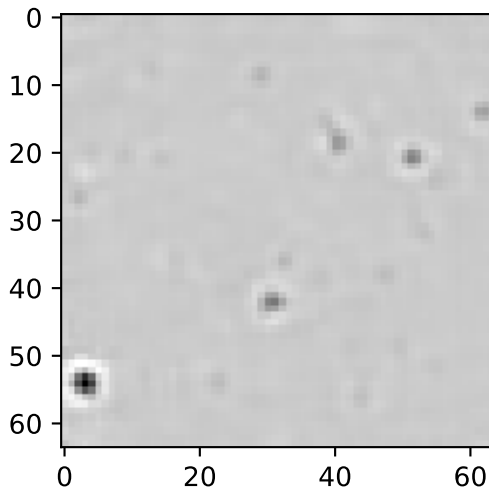

Supplement: supplementary_material [file attachment]

original

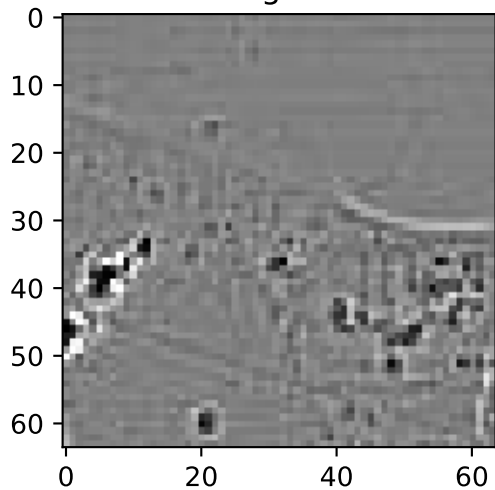

reconstruction

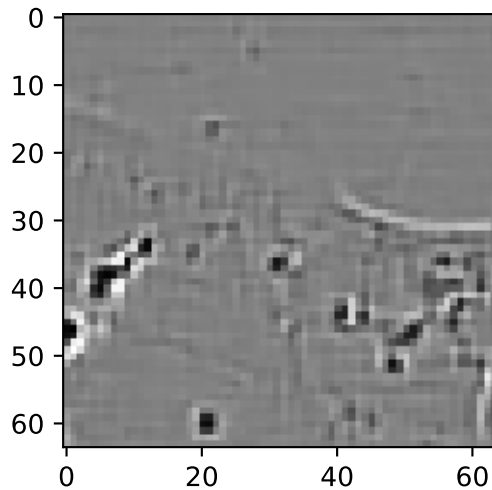

Supplement: supplementary_material [file attachment]

original

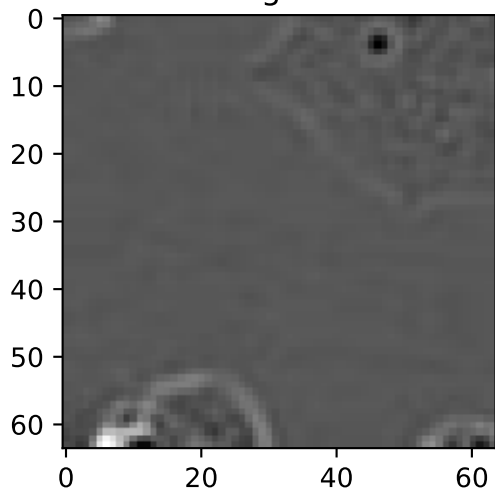

reconstruction

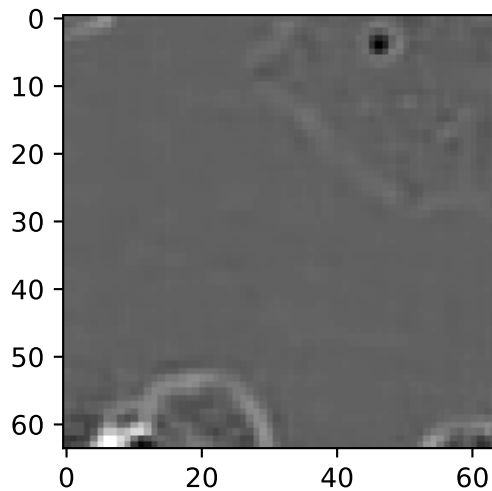

Supplement: supplementary_material [file attachment]

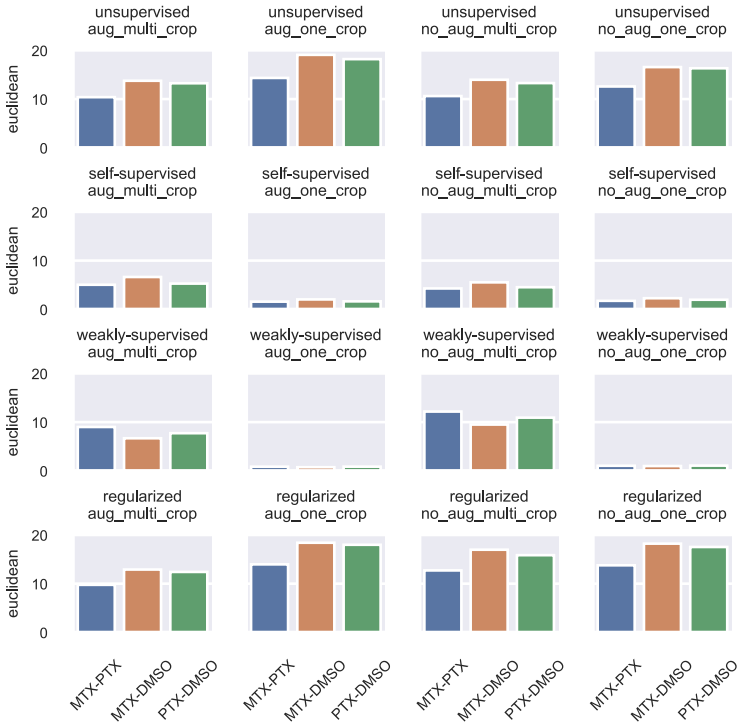

Supplement: supplementary_material [file attachment]

original

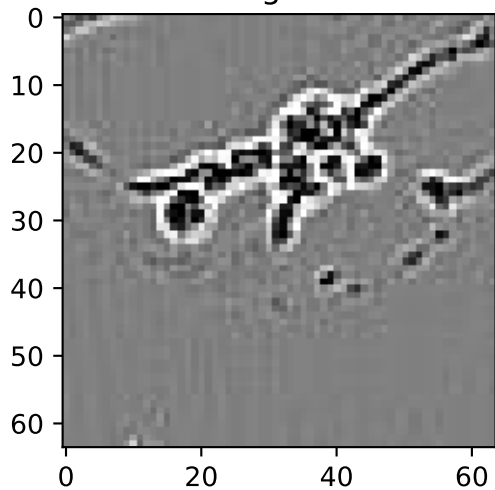

reconstruction

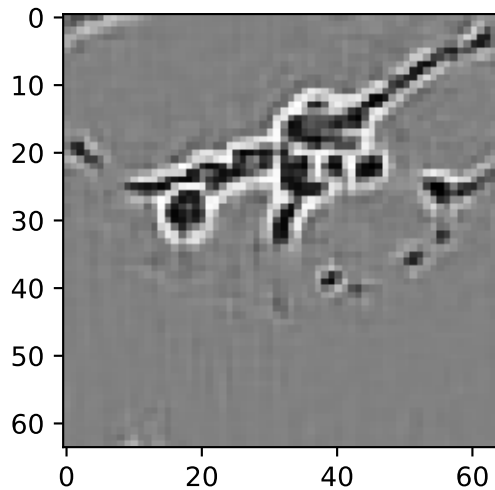

Supplement: supplementary_material [file attachment]

original

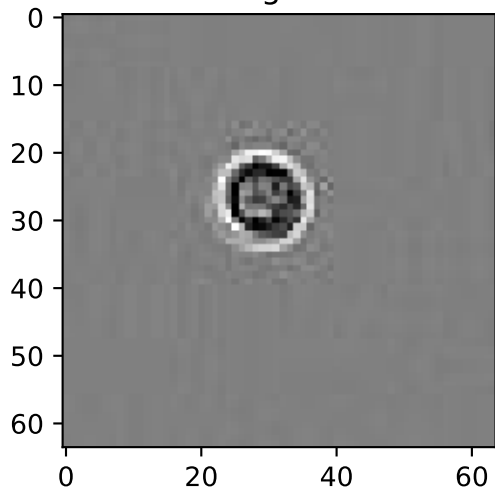

reconstruction

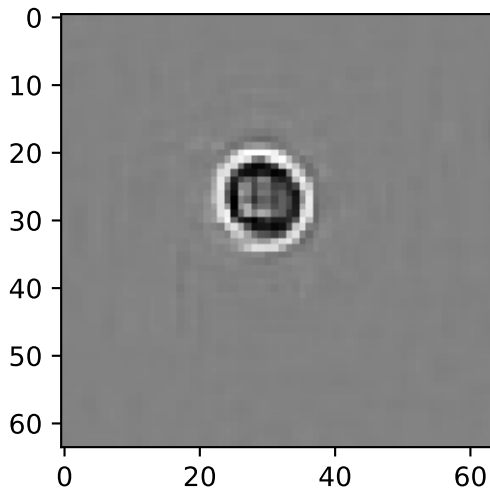

Supplement: supplementary_material [file attachment]

original

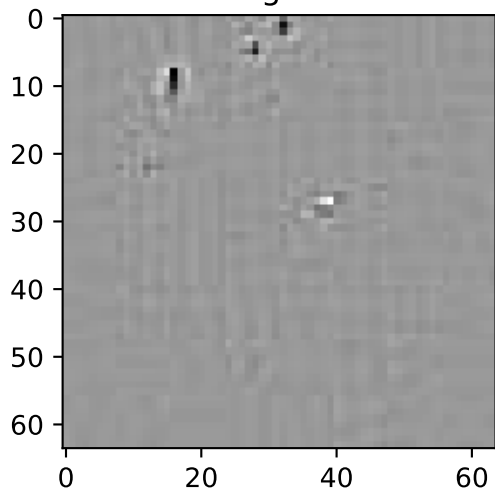

reconstruction

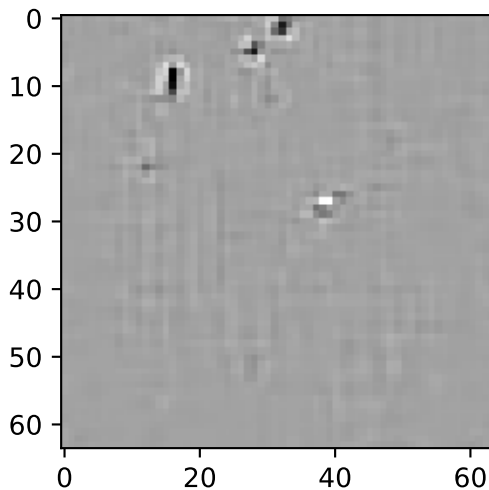

Supplement: supplementary_material [file attachment]

original

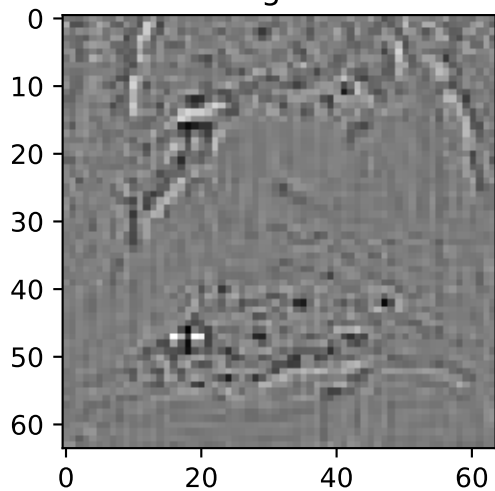

reconstruction

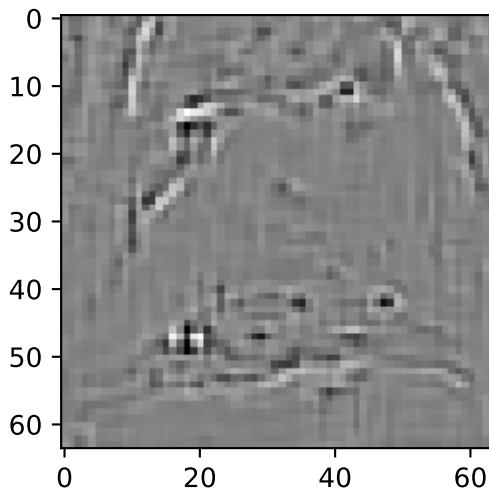

Supplement: supplementary_material [file attachment]

original

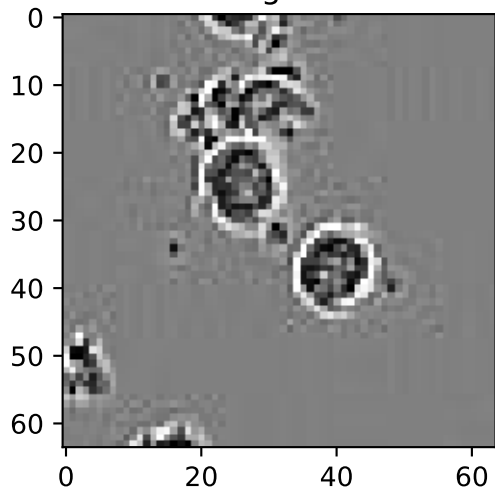

reconstruction

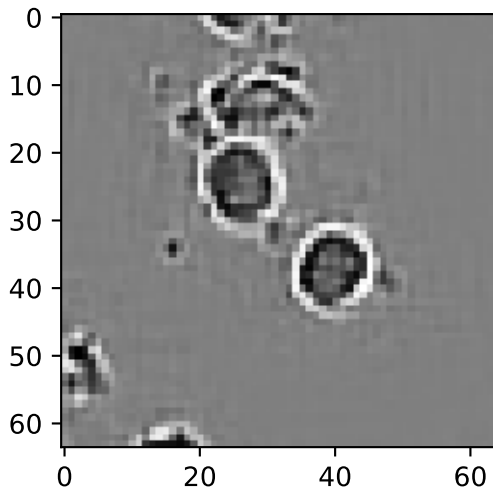

Supplement: supplementary_material [file attachment]

original

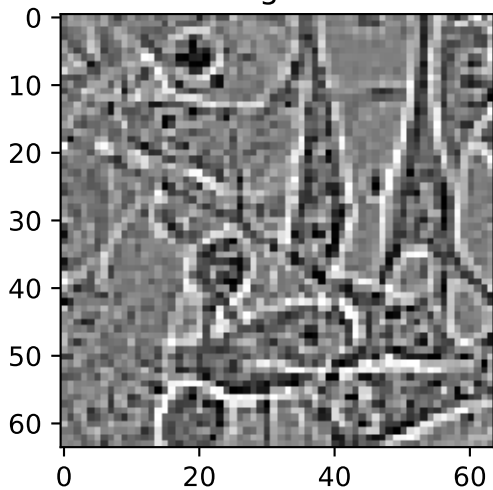

reconstruction

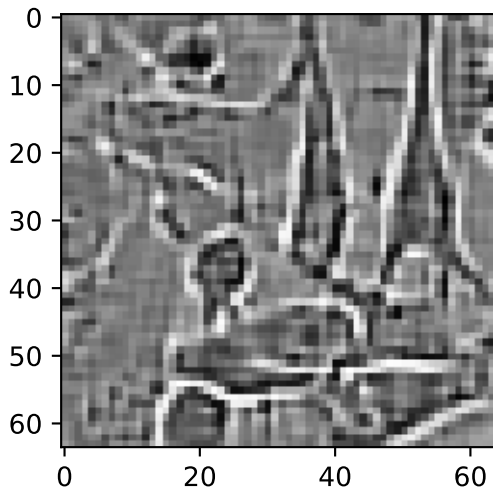

Supplement: supplementary_material [file attachment]

original

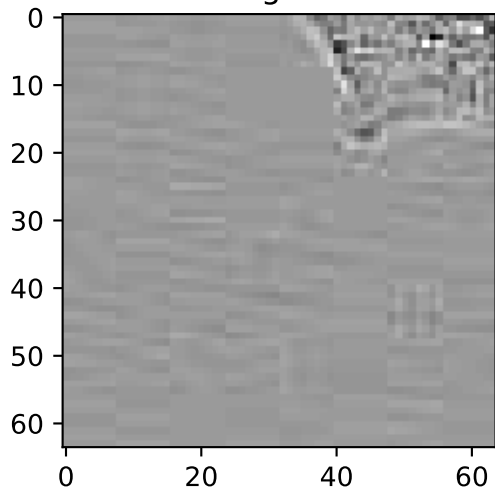

reconstruction

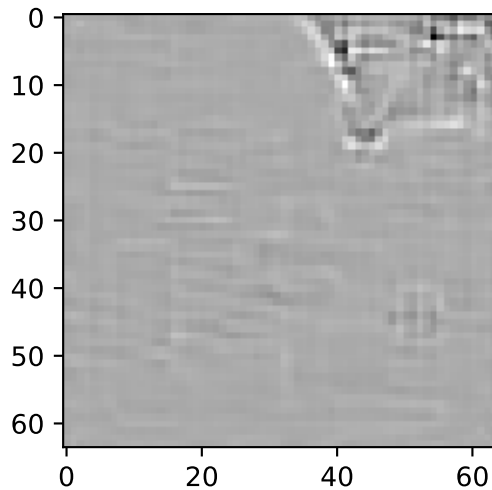

Supplement: supplementary_material [file attachment]

original

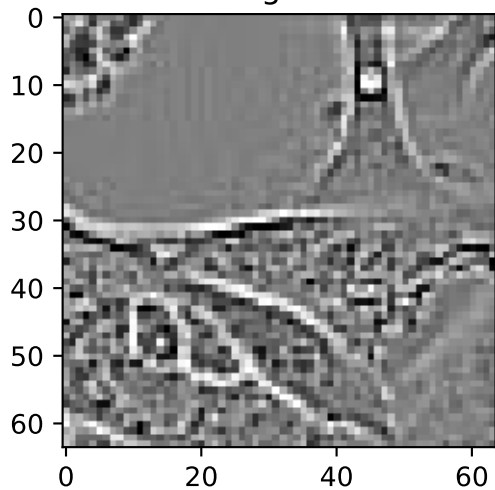

reconstruction

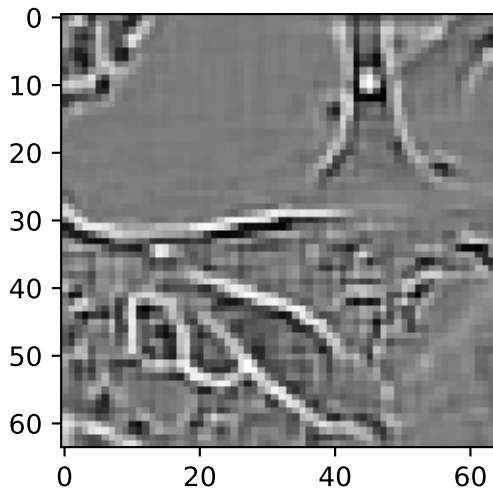

Supplement: supplementary_material [file attachment]

original

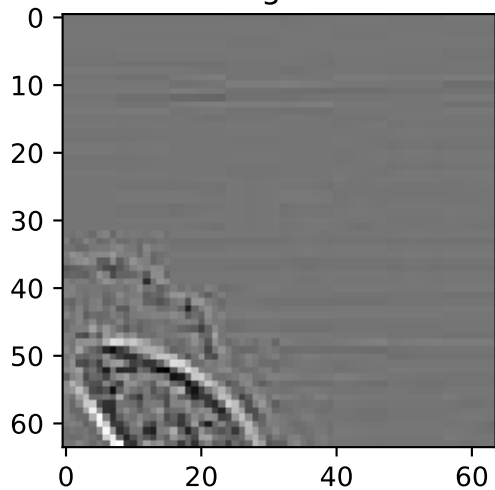

reconstruction

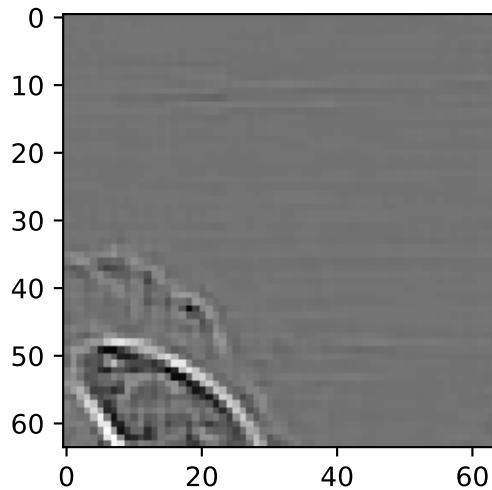

Supplement: supplementary_material [file attachment]

original

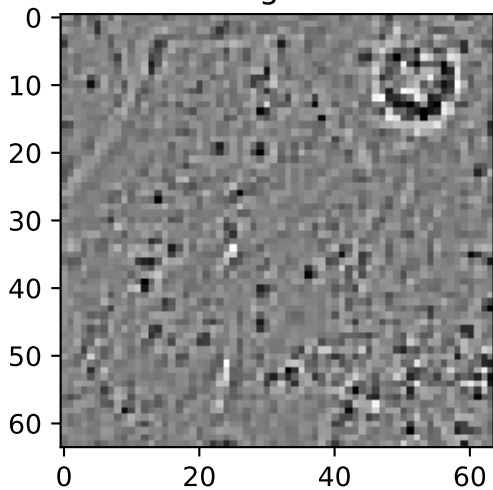

reconstruction

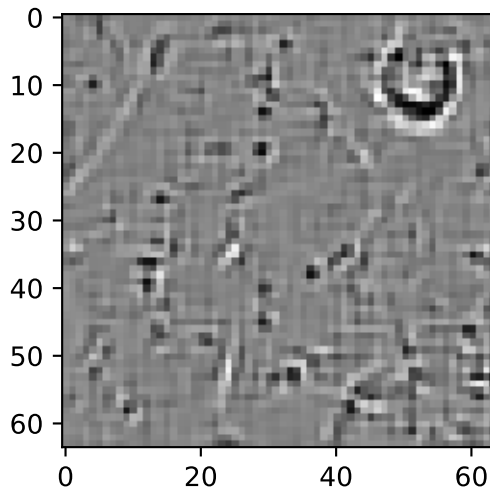

Supplement: supplementary_material [file attachment]

original

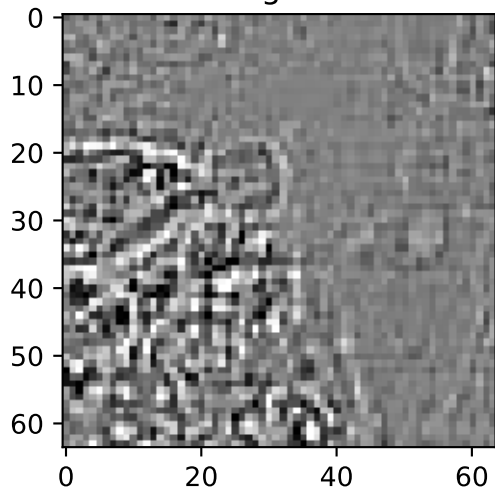

reconstruction

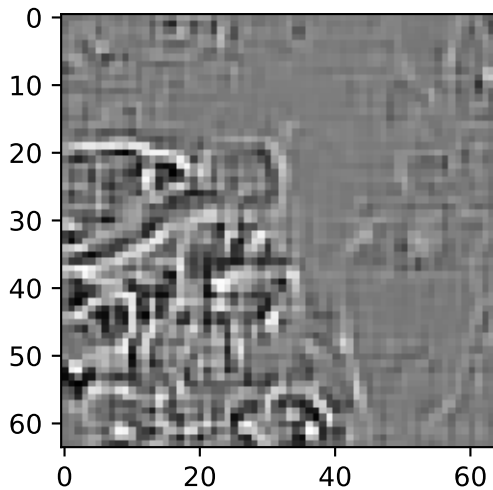

Supplement: supplementary_material [file attachment]

original

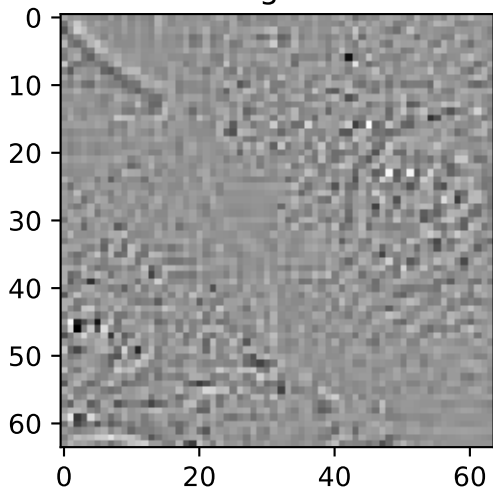

reconstruction

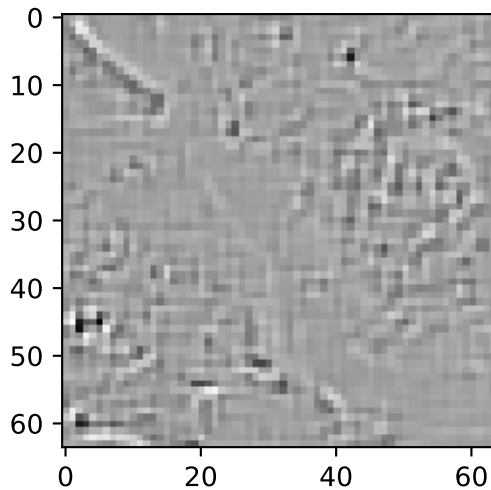

Supplement: supplementary_material [file attachment]

original

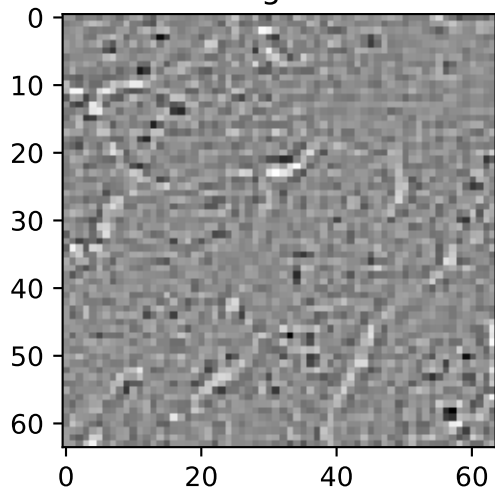

reconstruction

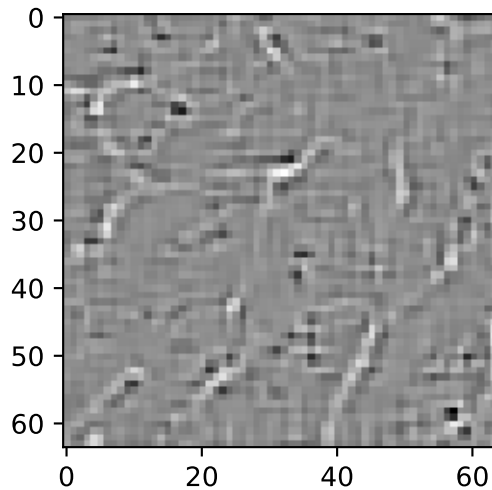

Supplement: supplementary_material [file attachment]

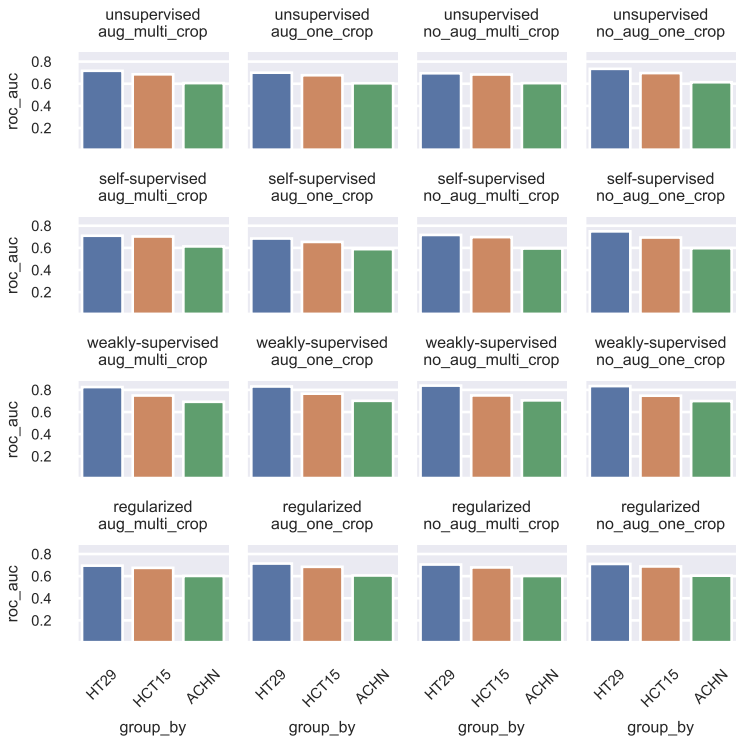

Supplement: supplementary_material [file attachment]

original

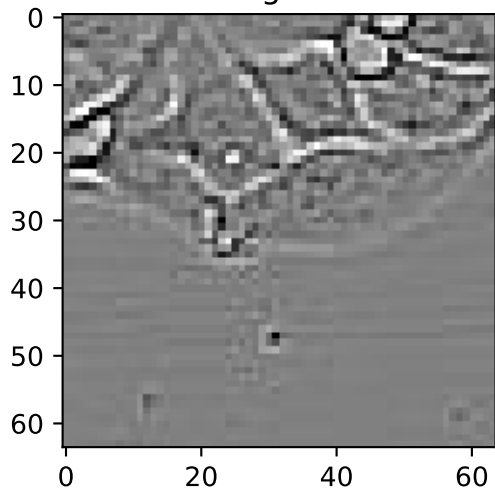

reconstruction

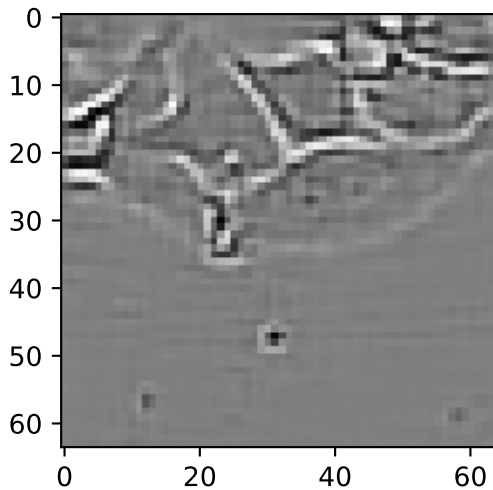

Supplement: supplementary_material [file attachment]

original

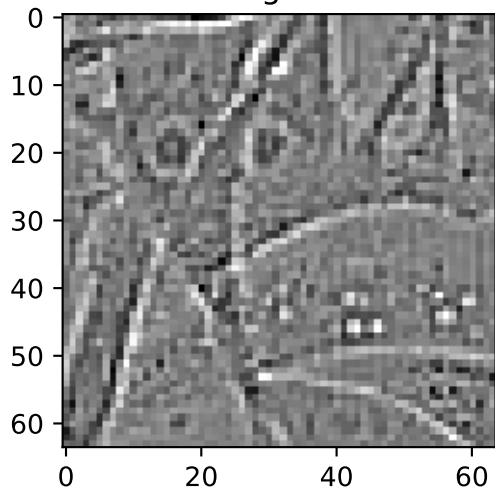

reconstruction

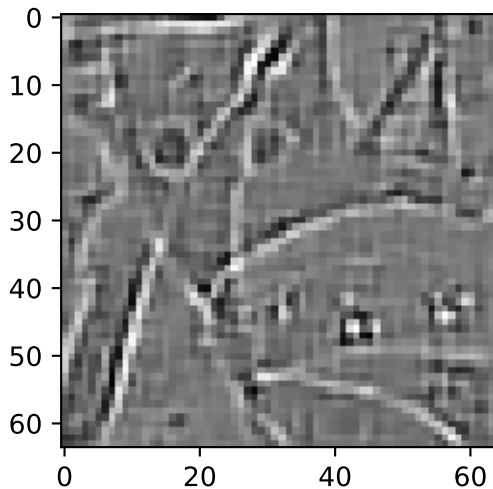

Supplement: supplementary_material [file attachment]

original

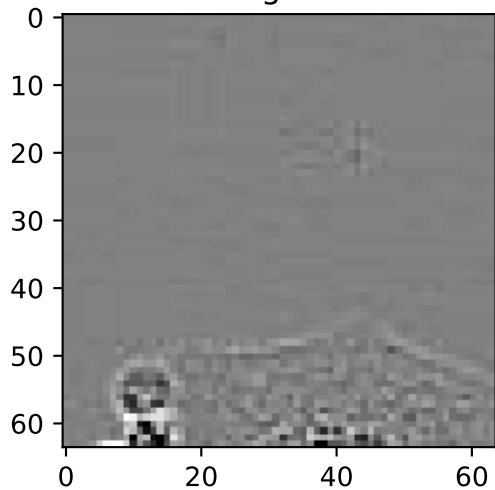

reconstruction

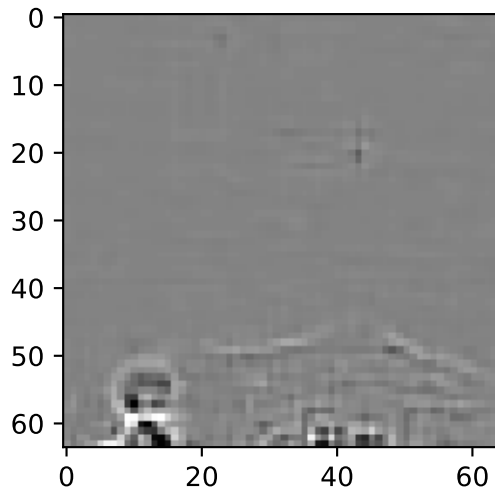

Supplement: supplementary_material [file attachment]

original

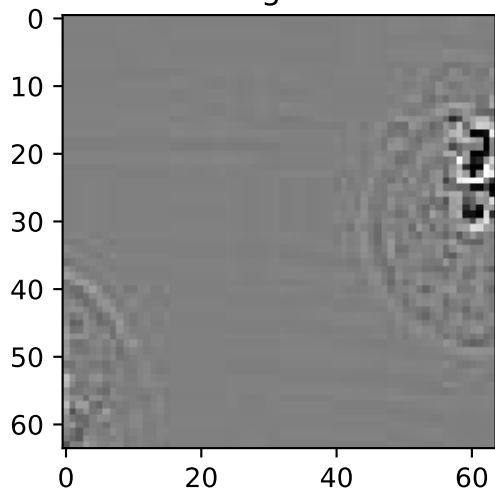

reconstruction

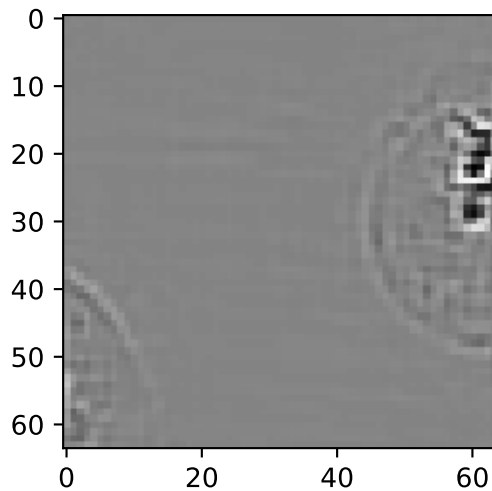

Supplement: supplementary_material [file attachment]

original

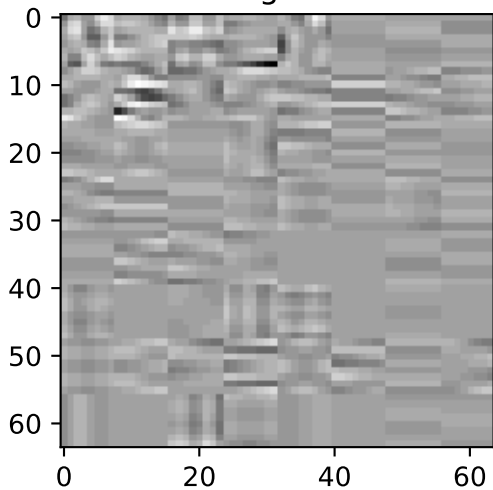

reconstruction

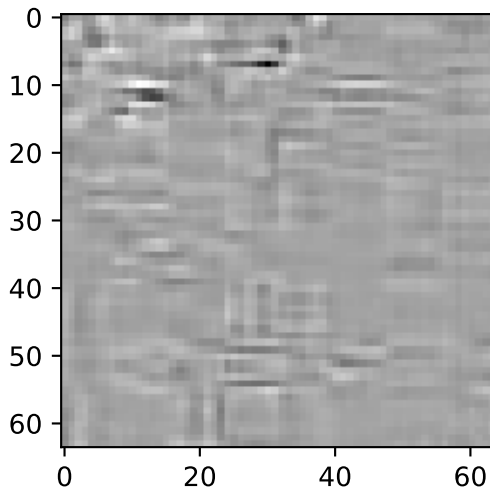

Supplement: supplementary_material [file attachment]

original

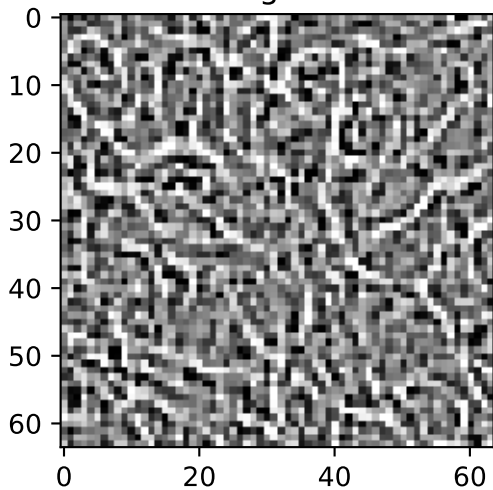

reconstruction

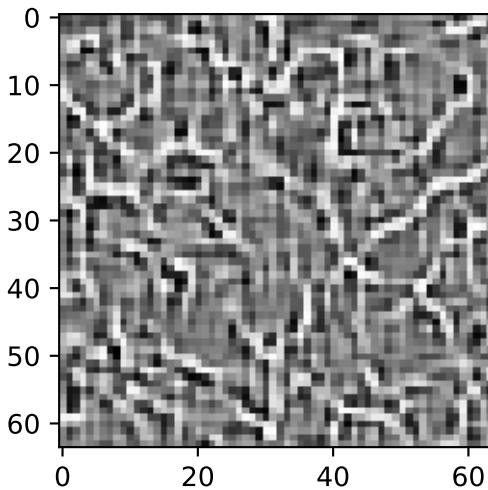

Supplement: supplementary_material [file attachment]

original

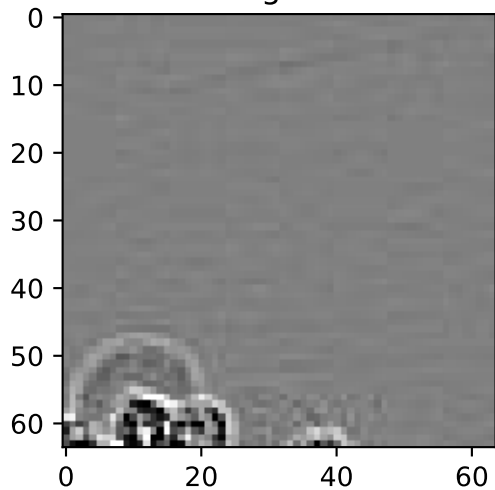

reconstruction

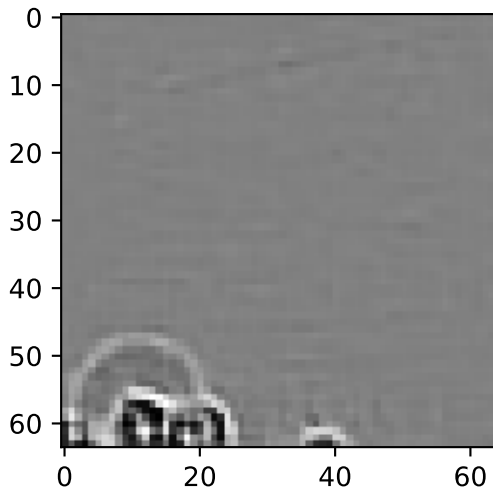

Supplement: supplementary_material [file attachment]

original

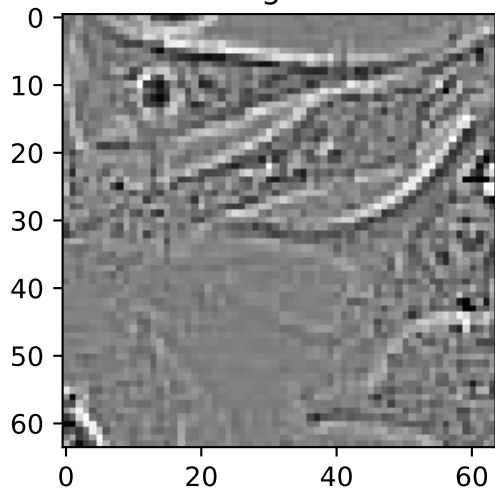

reconstruction

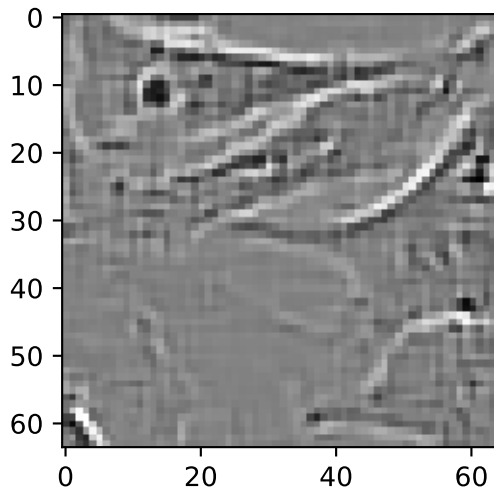

Supplement: supplementary_material [file attachment]

original

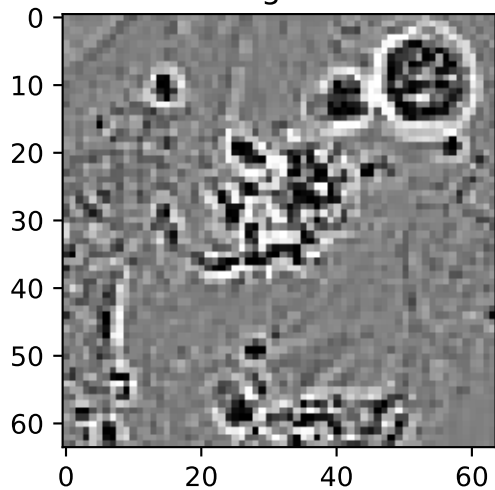

reconstruction

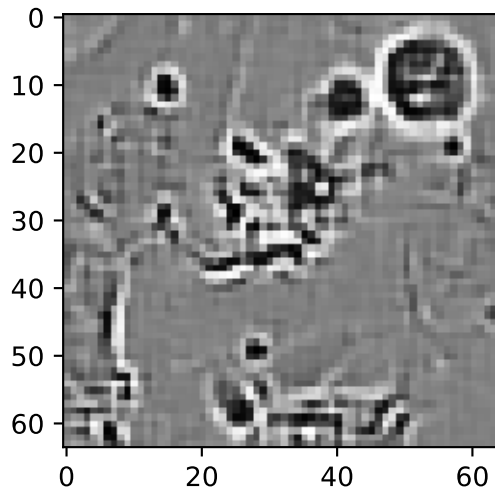

Supplement: supplementary_material [file attachment]

original

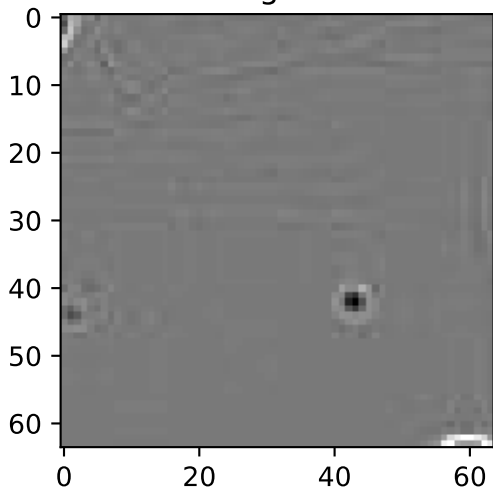

reconstruction

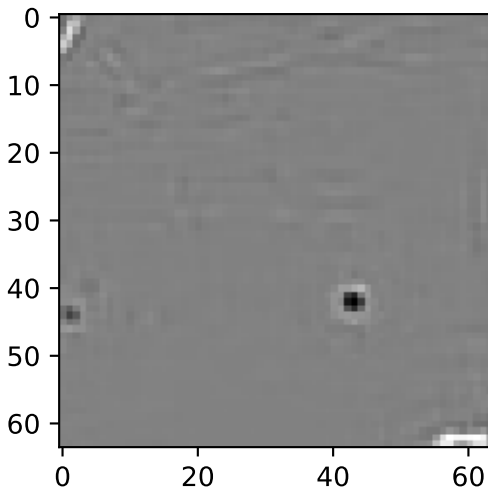

Supplement: supplementary_material [file attachment]

original

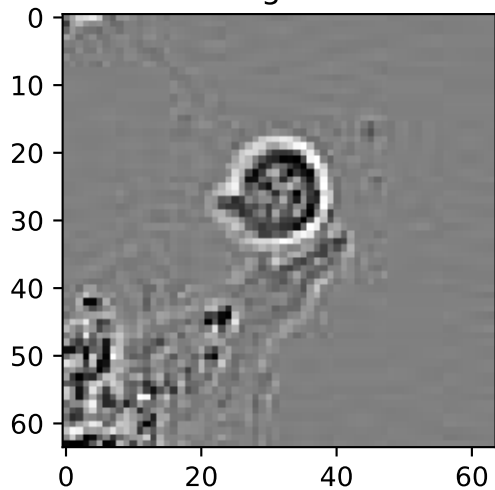

reconstruction

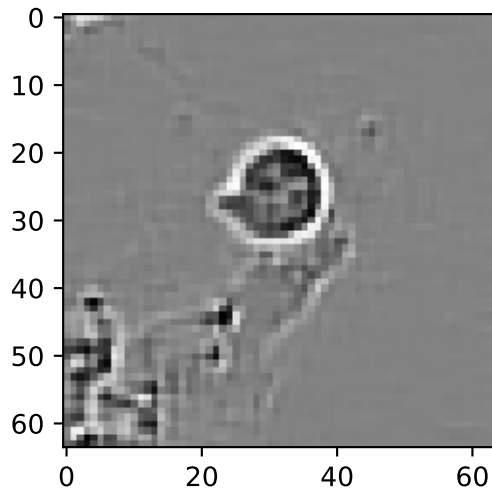

Supplement: supplementary_material [file attachment]

original

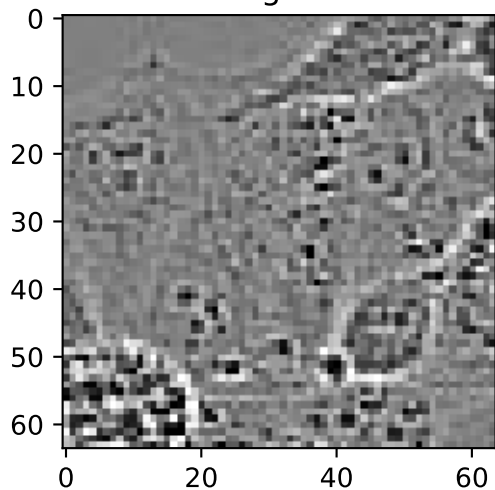

reconstruction

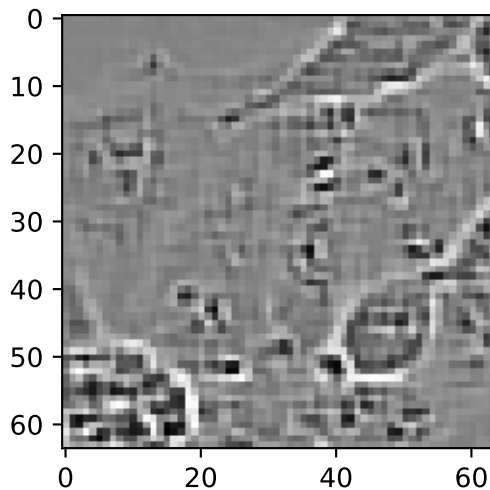

Supplement: supplementary_material [file attachment]

original

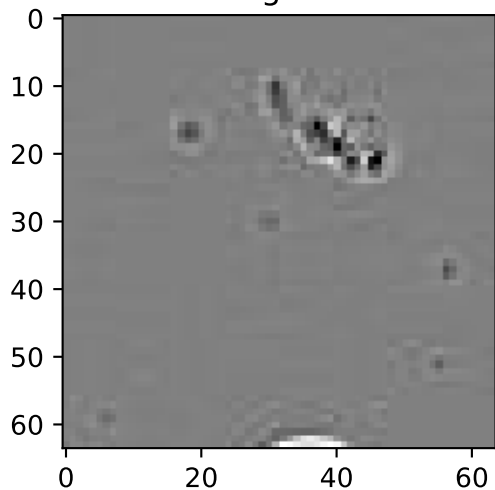

reconstruction

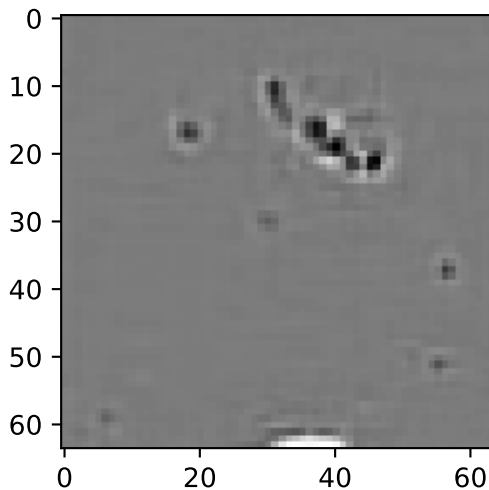

Supplement: supplementary_material [file attachment]

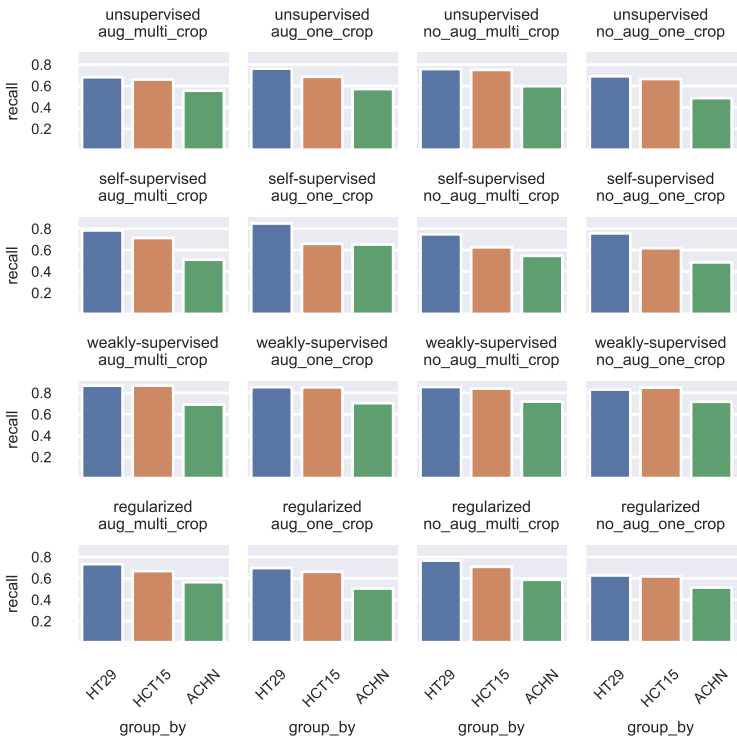

Supplement: supplementary_material [file attachment]

original

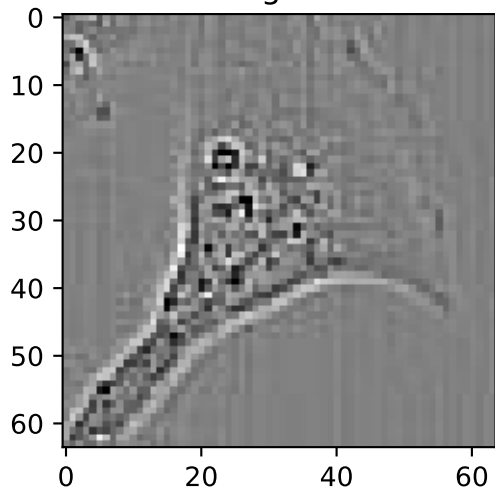

reconstruction

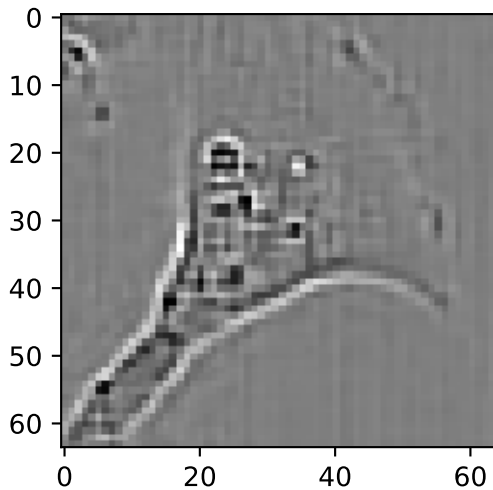

Supplement: supplementary_material [file attachment]

original

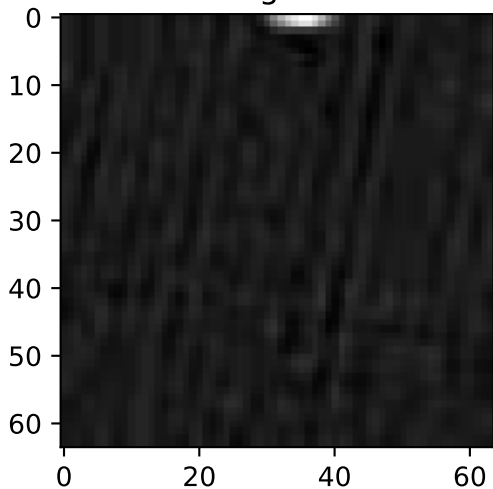

reconstruction

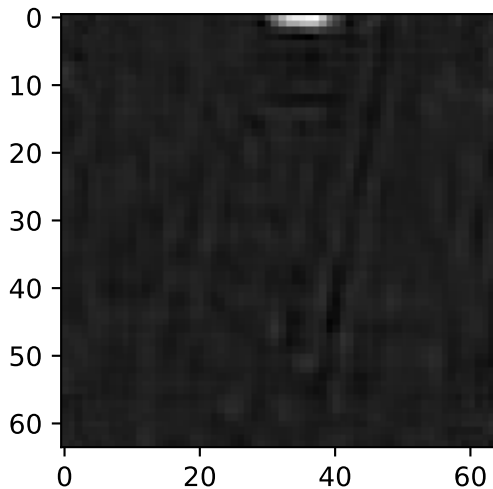

Supplement: supplementary_material [file attachment]

original

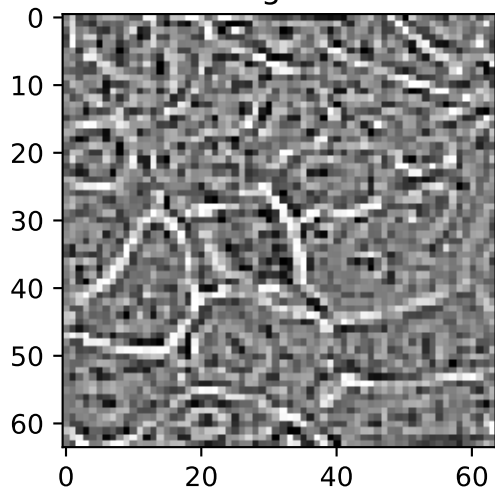

reconstruction

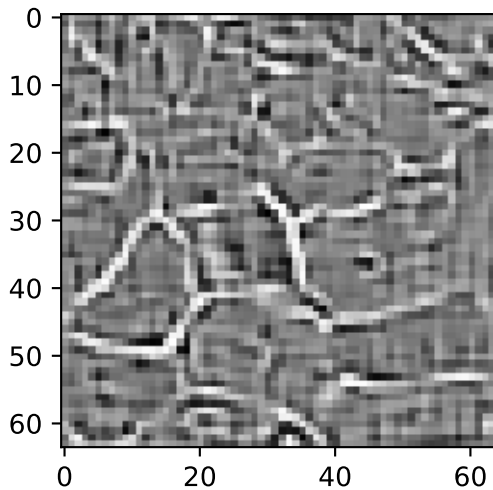

Supplement: supplementary_material [file attachment]

original

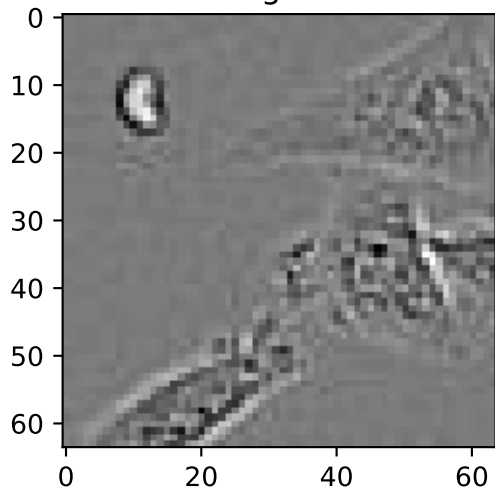

reconstruction

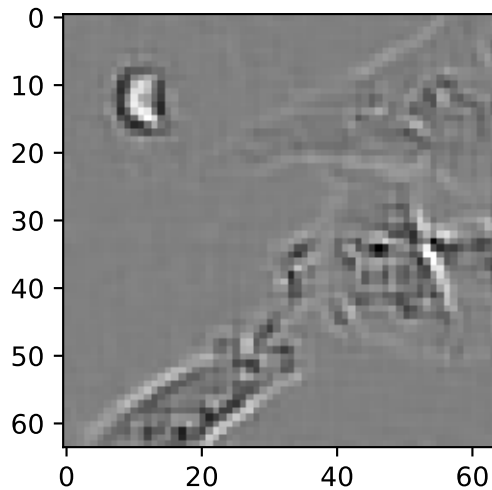

Supplement: supplementary_material [file attachment]

original

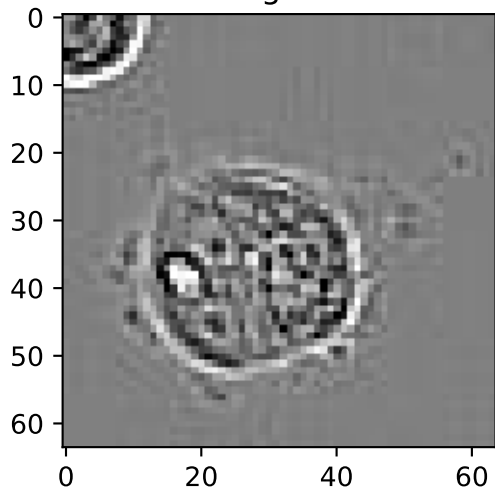

reconstruction

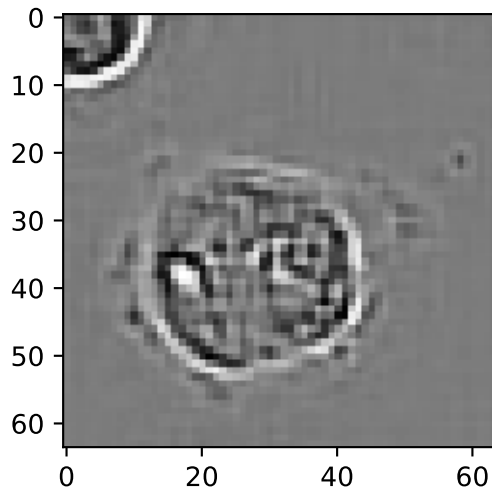

Supplement: supplementary_material [file attachment]

original

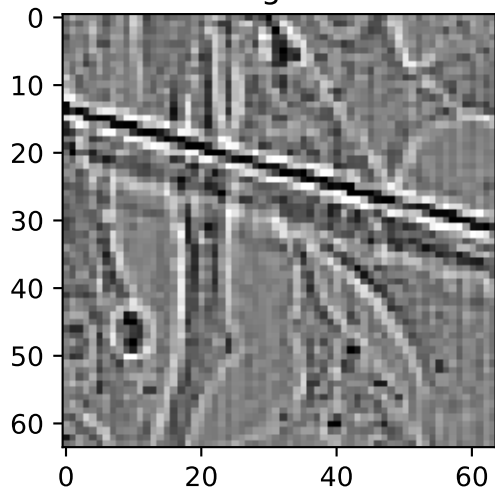

reconstruction

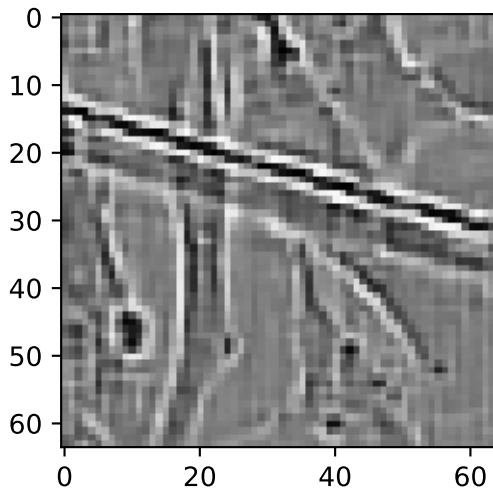

Supplement: supplementary_material [file attachment]

original

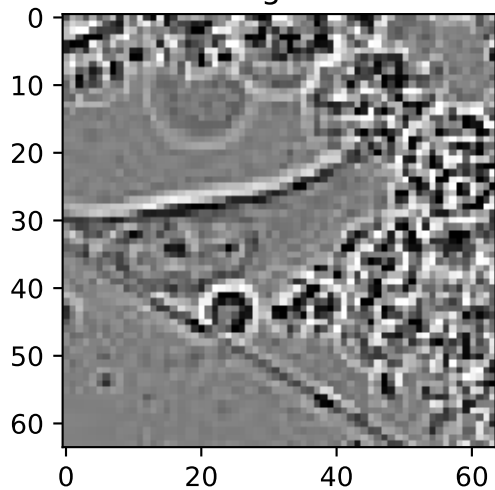

reconstruction

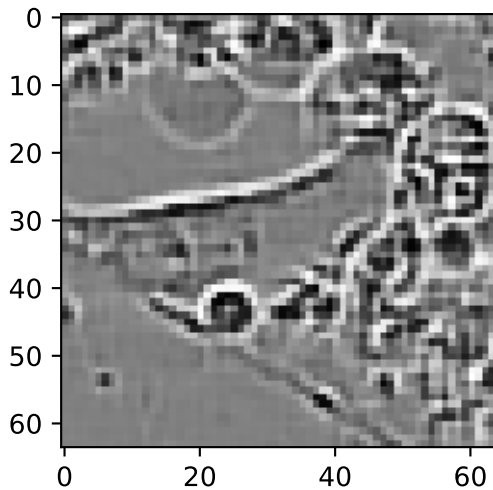

Supplement: supplementary_material [file attachment]

original

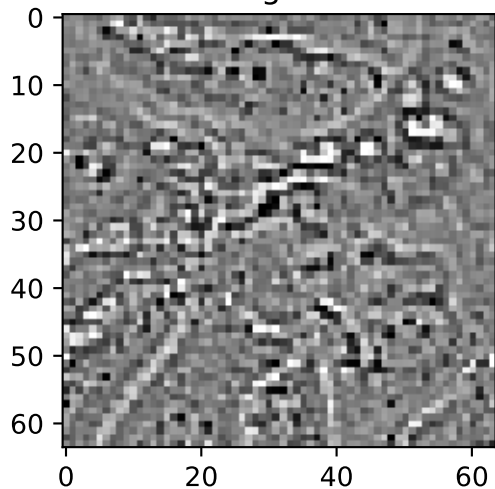

reconstruction

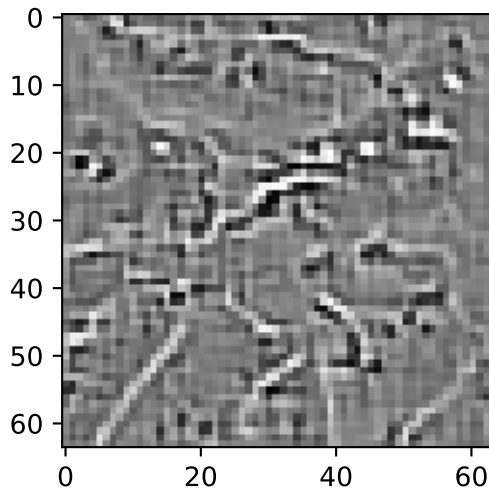

Supplement: supplementary_material [file attachment]

original

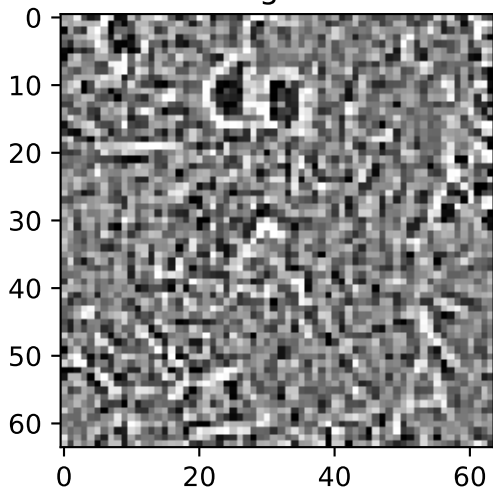

reconstruction

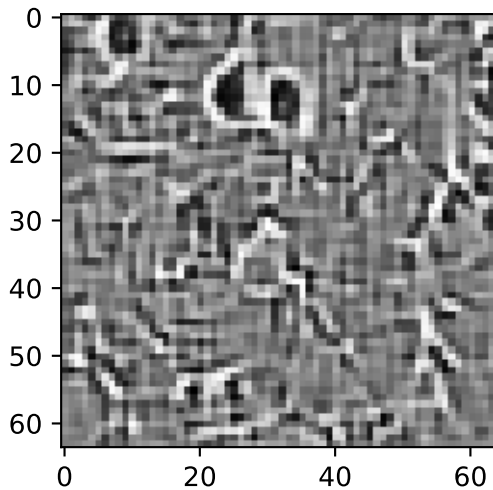

Supplement: supplementary_material [file attachment]

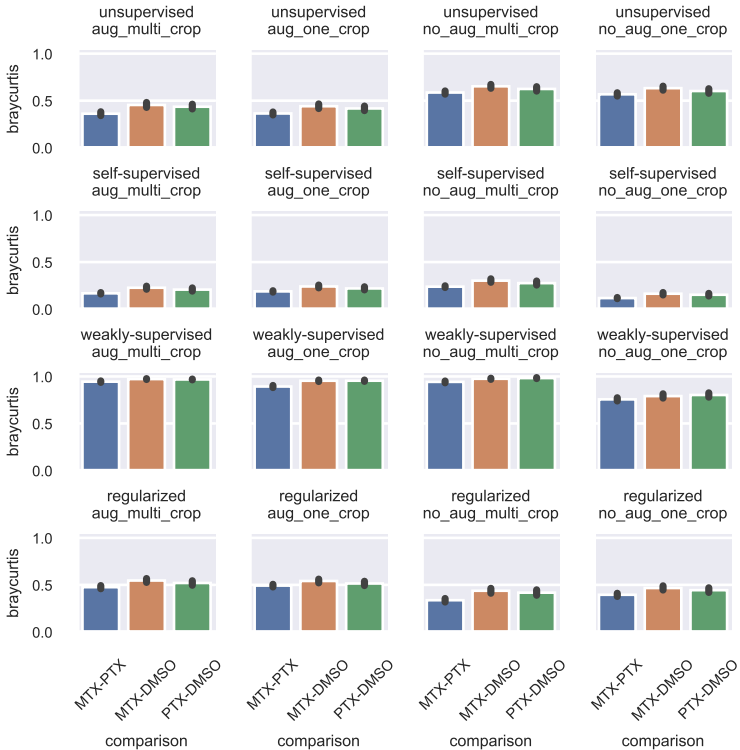

Supplement: supplementary_material [file attachment]

original

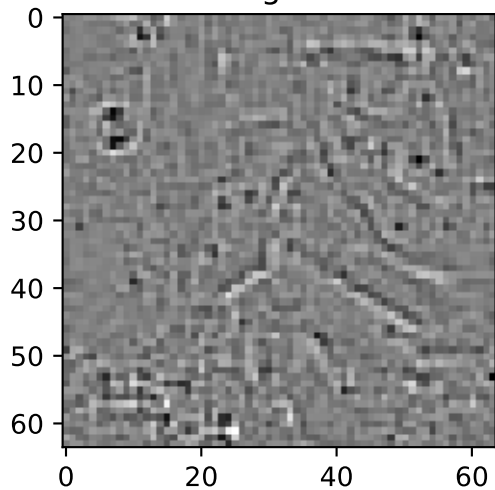

reconstruction

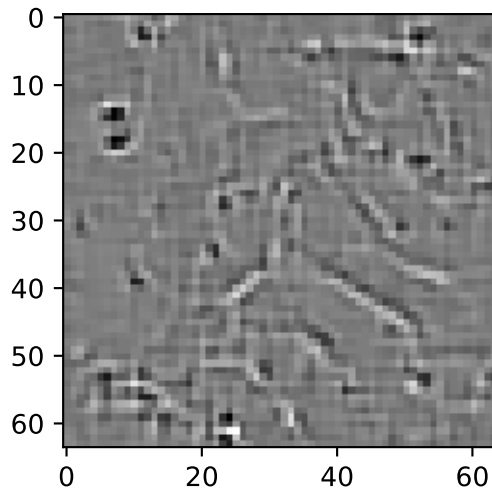

Supplement: supplementary_material [file attachment]

original

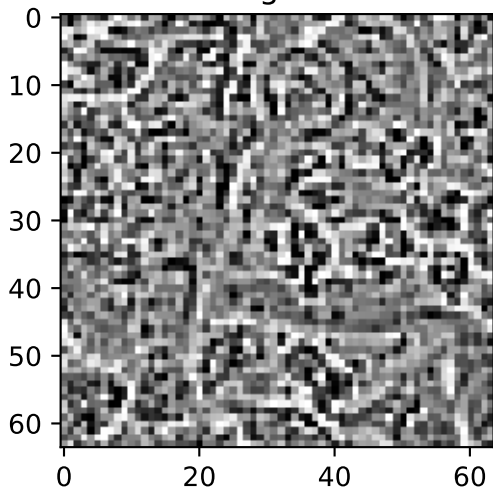

reconstruction

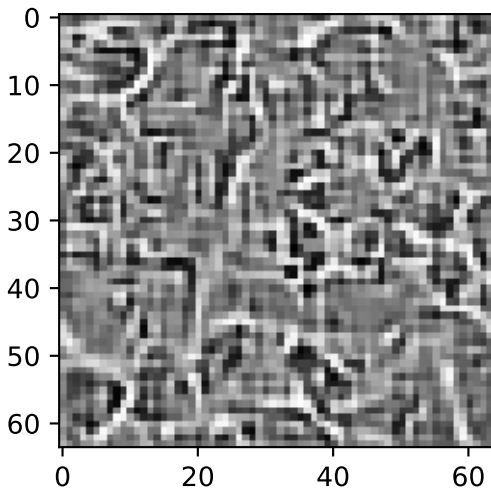

Supplement: supplementary_material [file attachment]

original

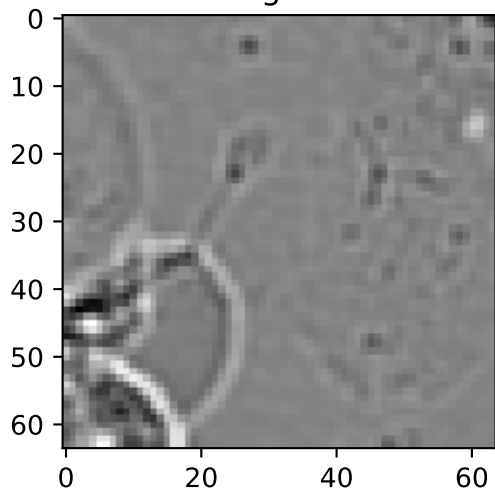

reconstruction

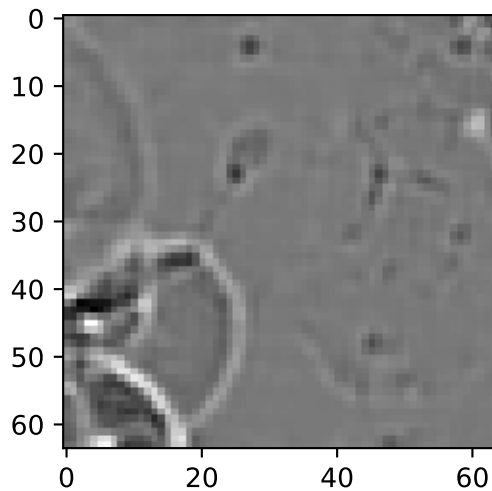

Supplement: supplementary_material [file attachment]

original

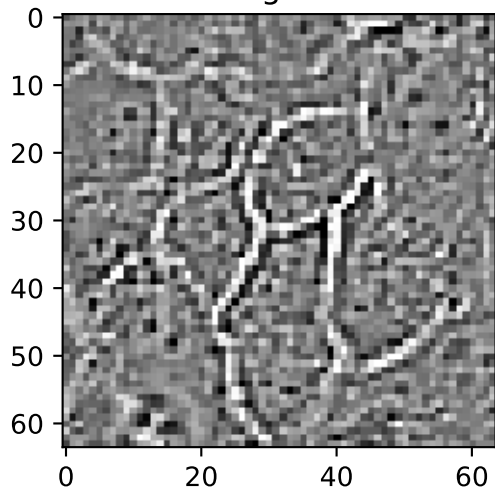

reconstruction

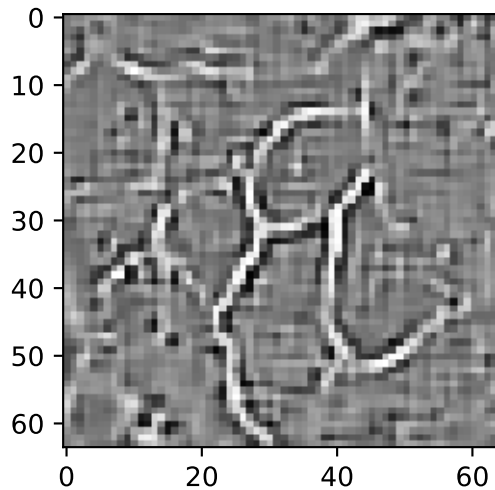

Supplement: supplementary_material [file attachment]

original

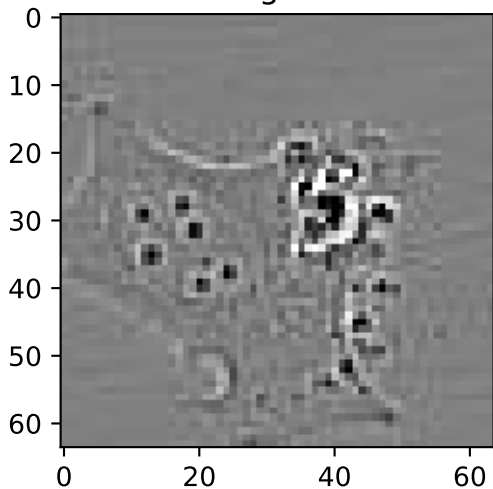

reconstruction

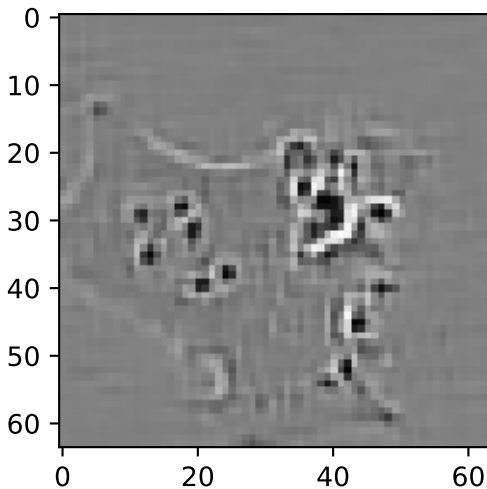

Supplement: supplementary_material [file attachment]

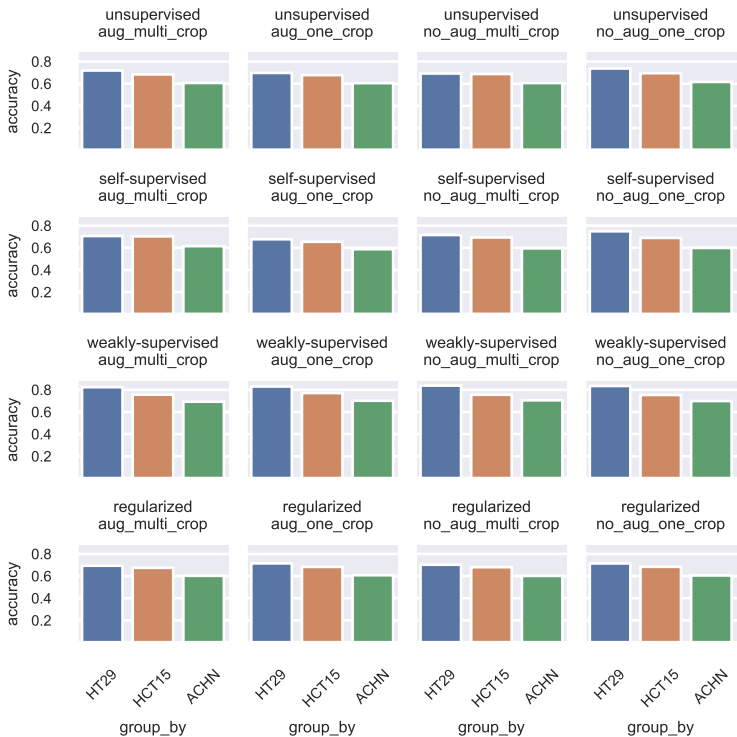

Supplement: supplementary_material [file attachment]

original

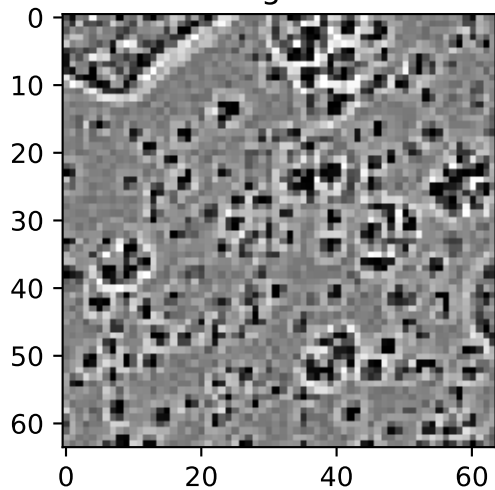

reconstruction

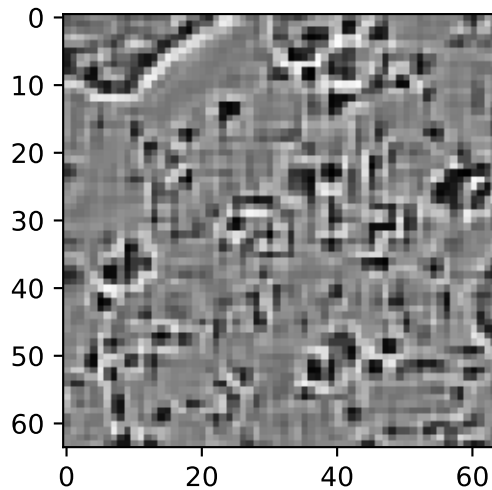

Supplement: supplementary_material [file attachment]

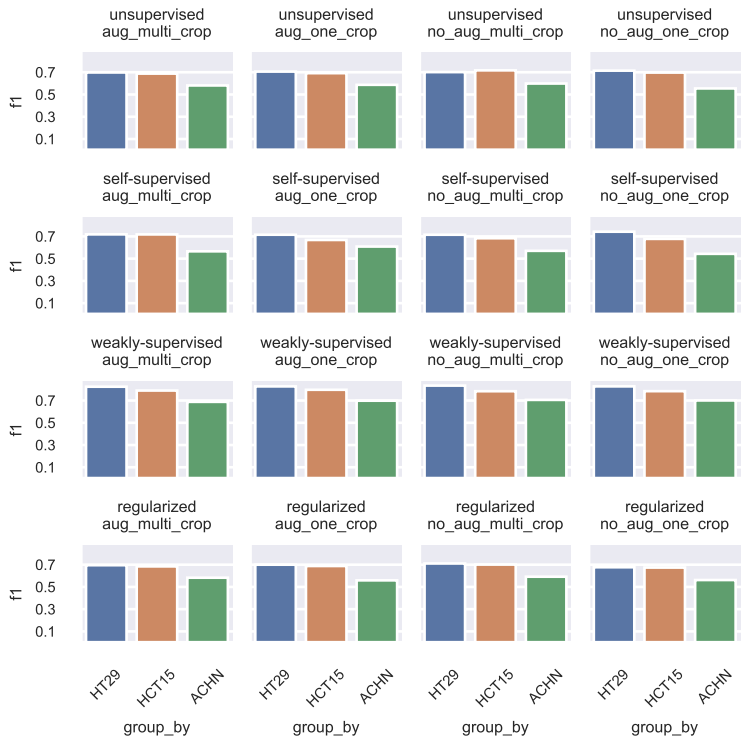

Supplement: supplementary_material [file attachment]

original

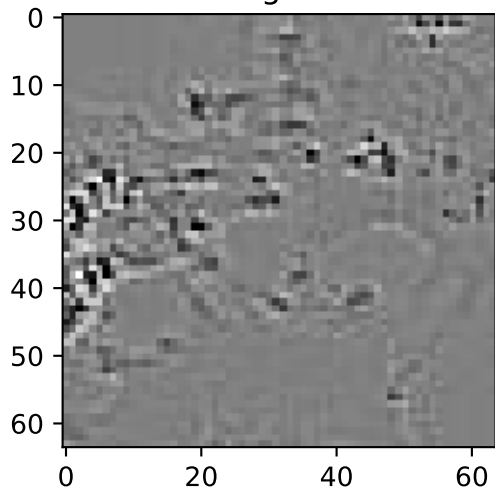

reconstruction

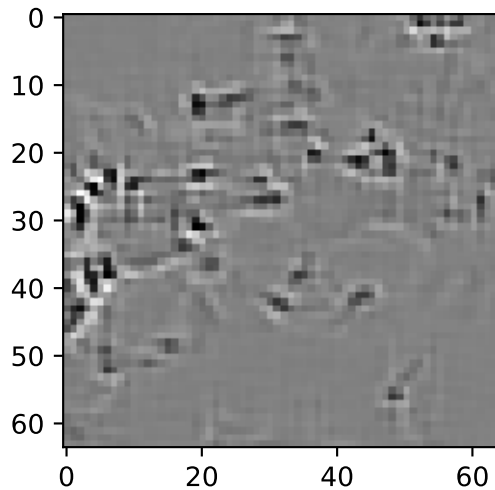

Supplement: supplementary_material [file attachment]

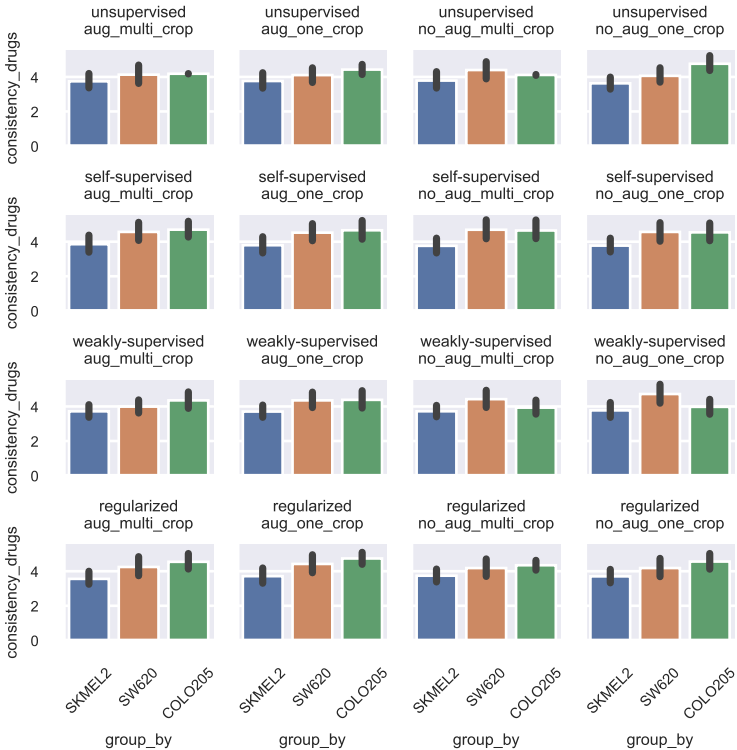

Supplement: supplementary_material [file attachment]

original

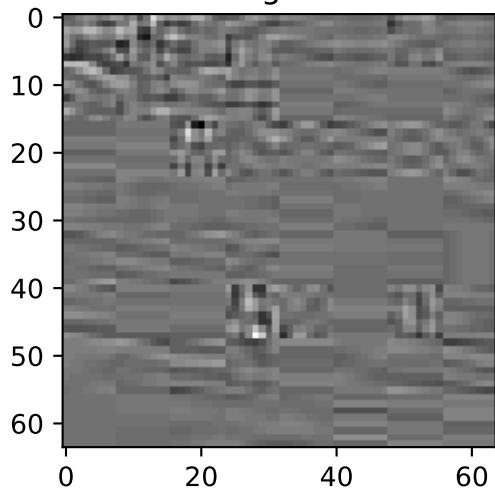

reconstruction

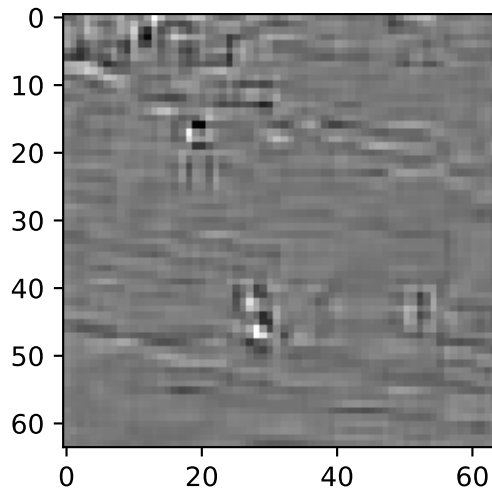

Supplement: supplementary_material [file attachment]

original

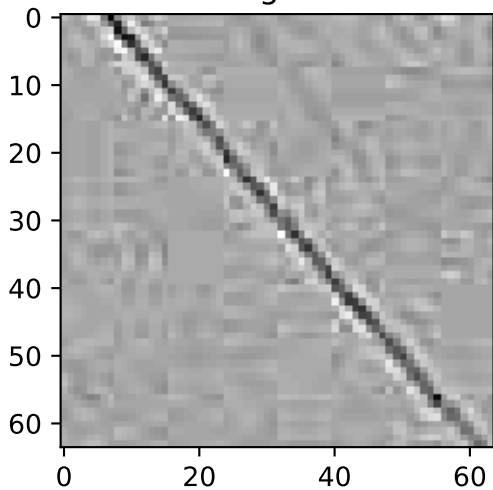

reconstruction

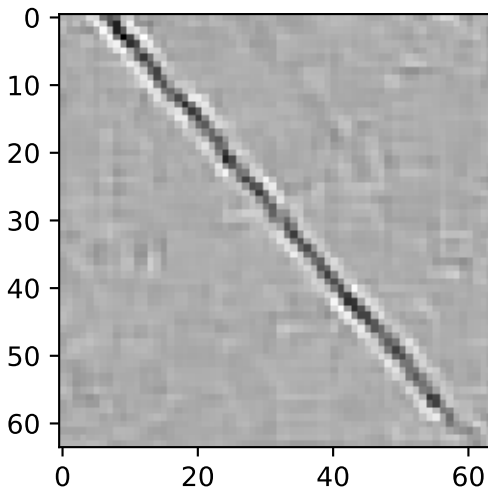

Supplement: supplementary_material [file attachment]

original

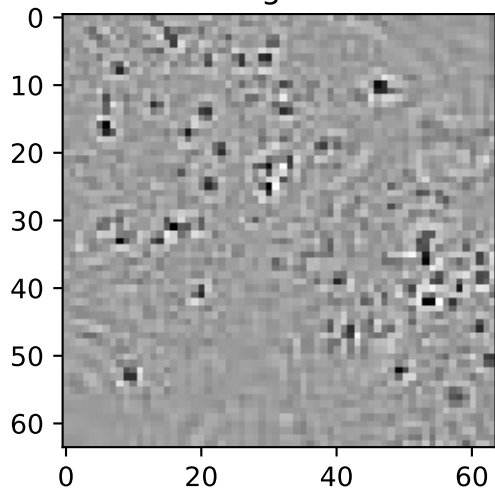

reconstruction

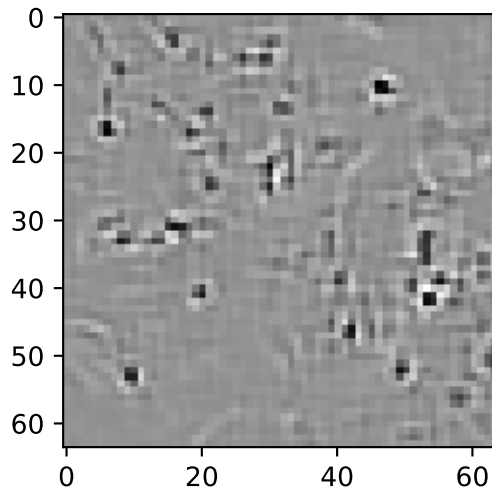

Supplement: supplementary_material [file attachment]

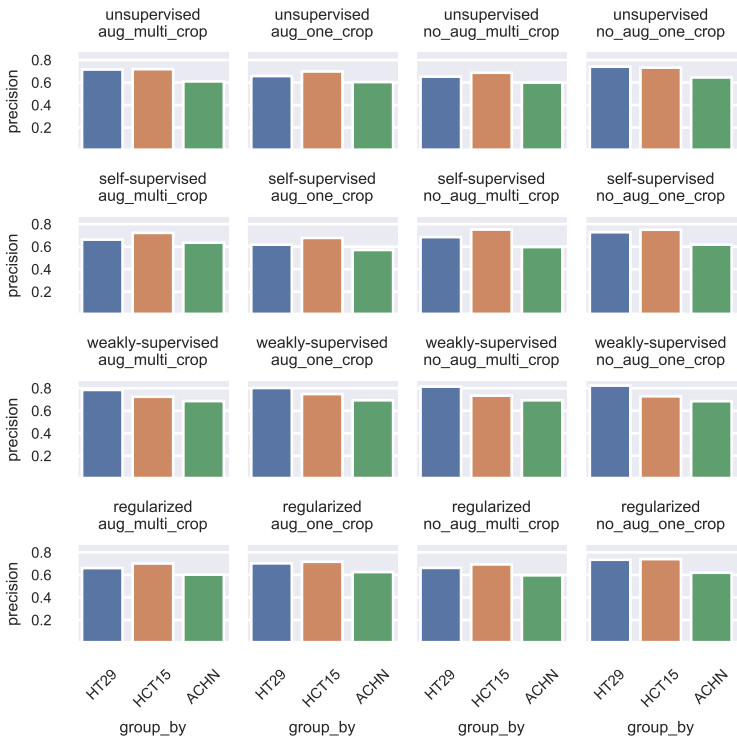

Supplement: supplementary_material [file attachment]

original

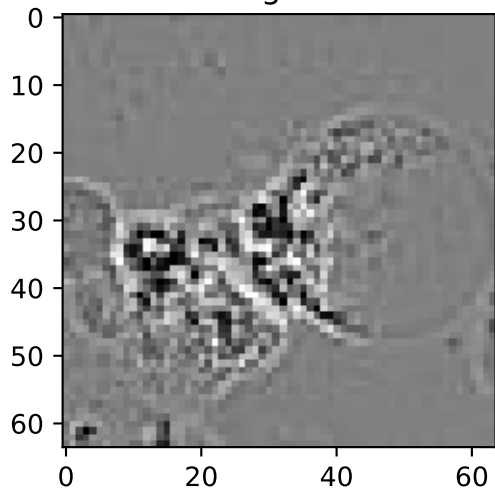

reconstruction

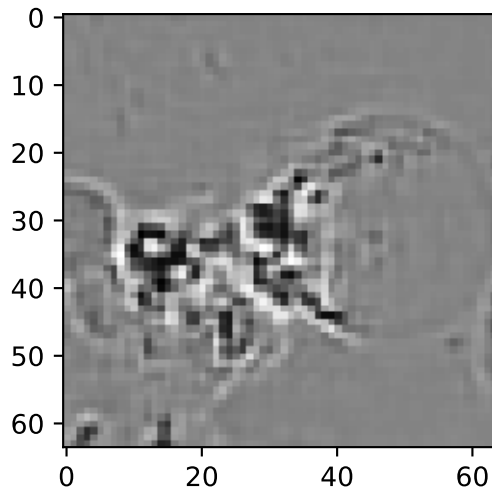

Supplement: supplementary_material [file attachment]

original

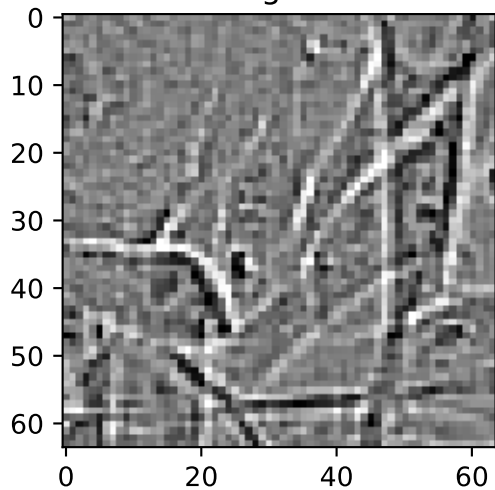

reconstruction

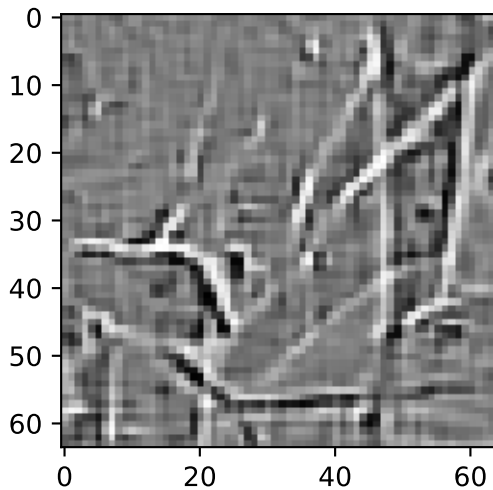

Supplement: supplementary_material [file attachment]

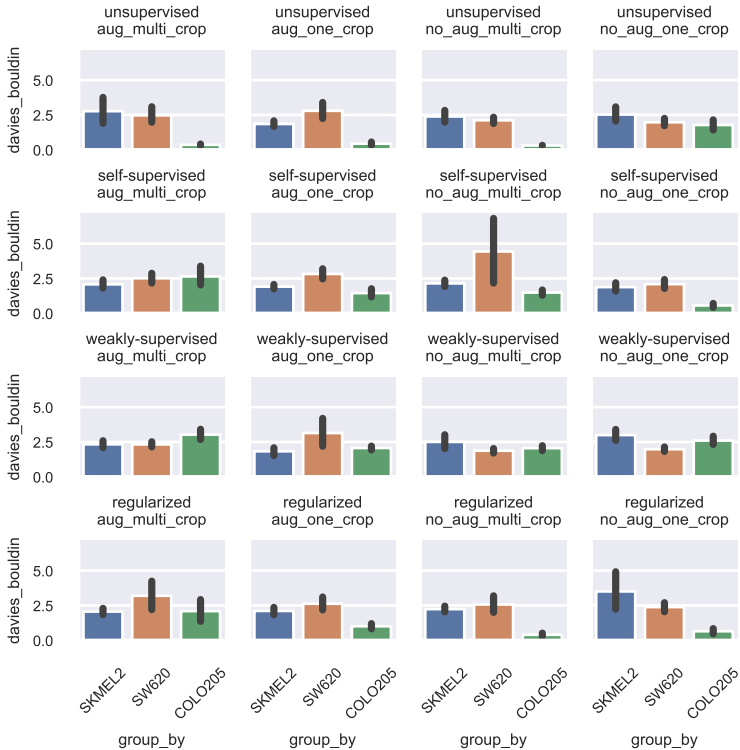

Supplement: supplementary_material [file attachment]

original

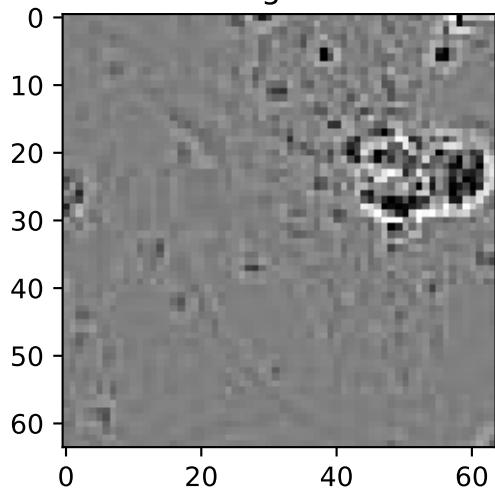

reconstruction

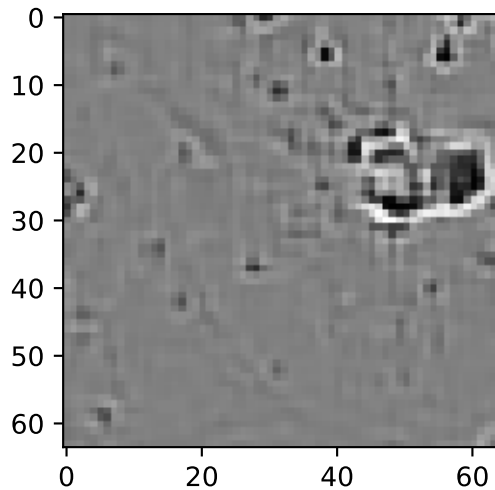

Supplement: supplementary_material [file attachment]

original

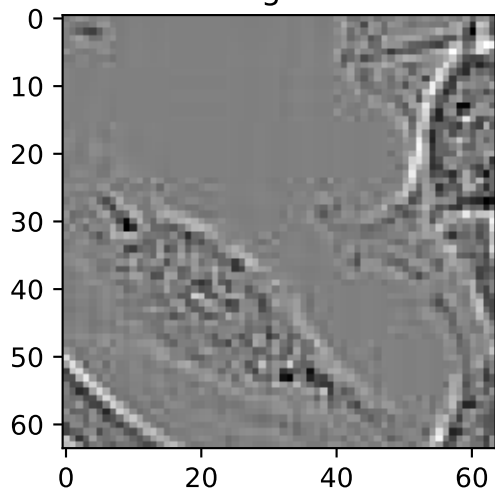

reconstruction

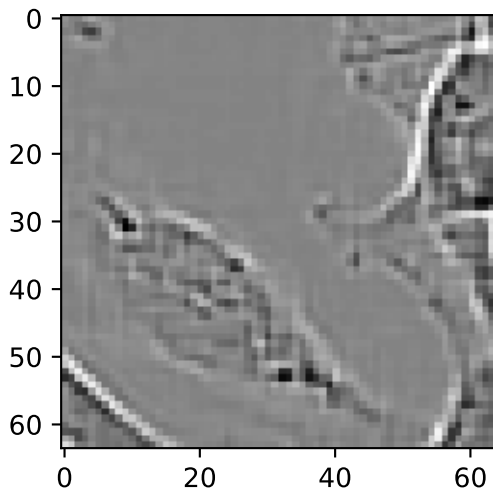

Supplement: supplementary_material [file attachment]

original

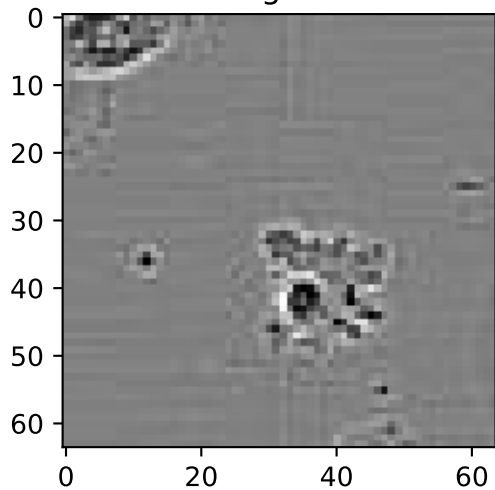

reconstruction

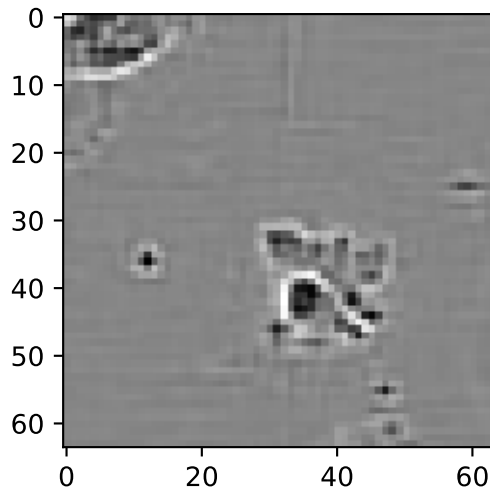

Supplement: supplementary_material [file attachment]

original

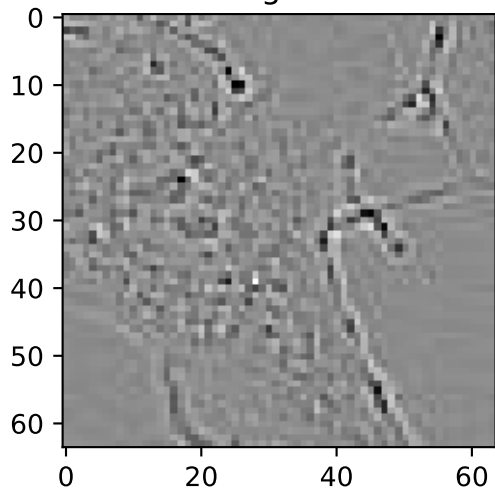

reconstruction

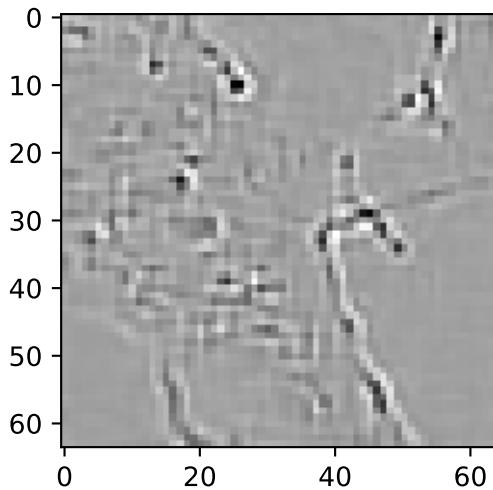

Supplement: supplementary_material [file attachment]

original

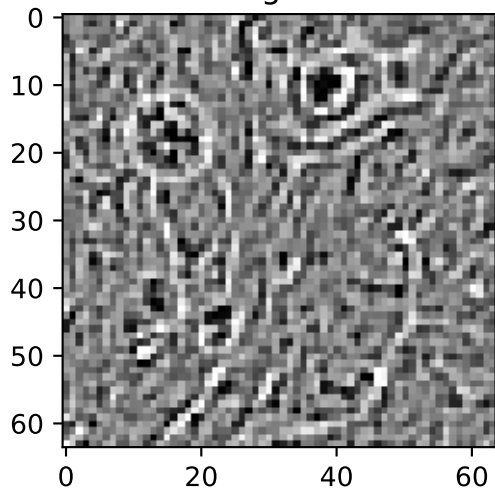

reconstruction

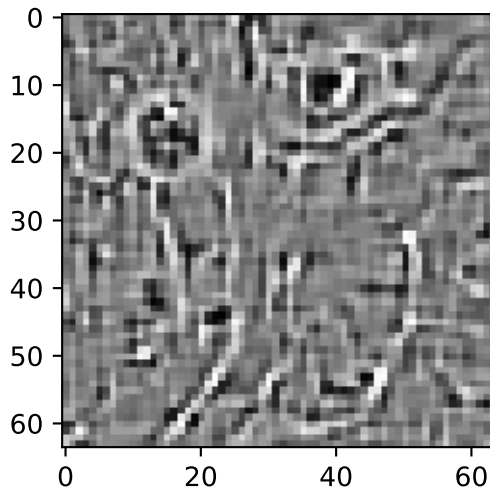

Supplement: supplementary_material [file attachment]

original

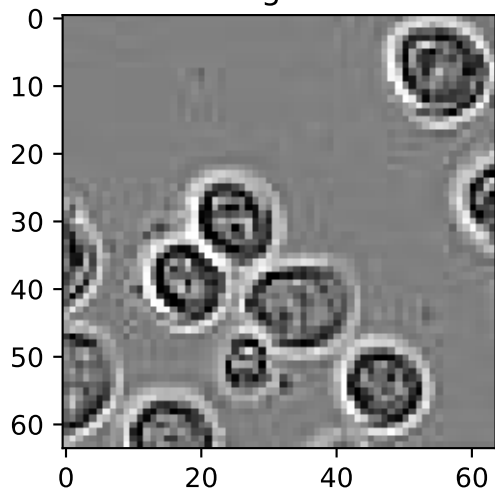

reconstruction

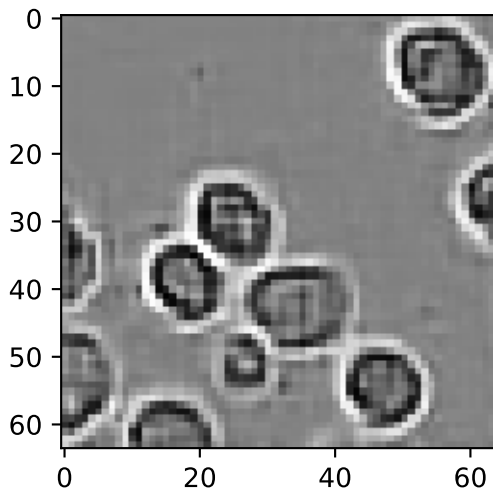

Supplement: supplementary_material [file attachment]

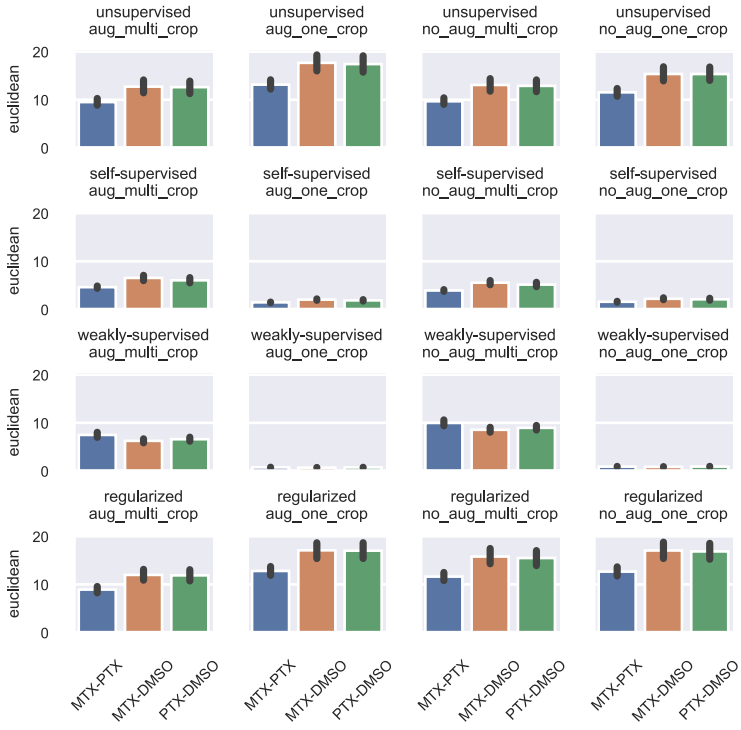

Supplement: supplementary_material [file attachment]

original

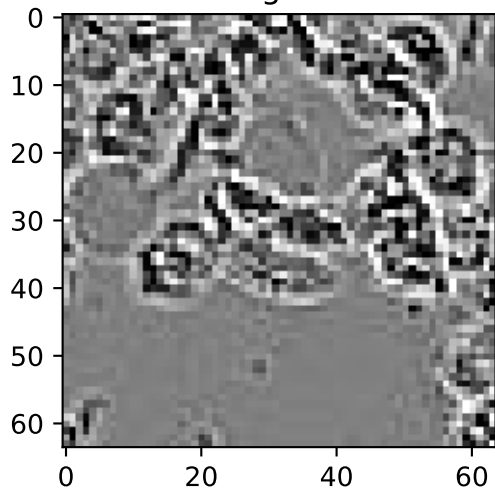

reconstruction

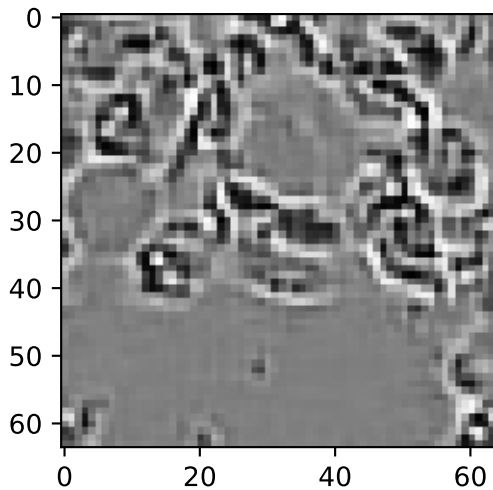

Supplement: supplementary_material [file attachment]

original

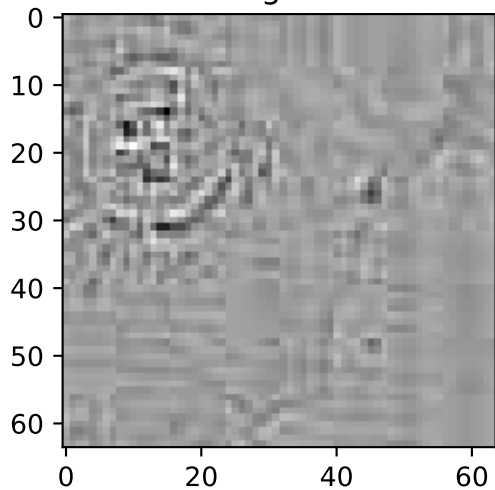

reconstruction

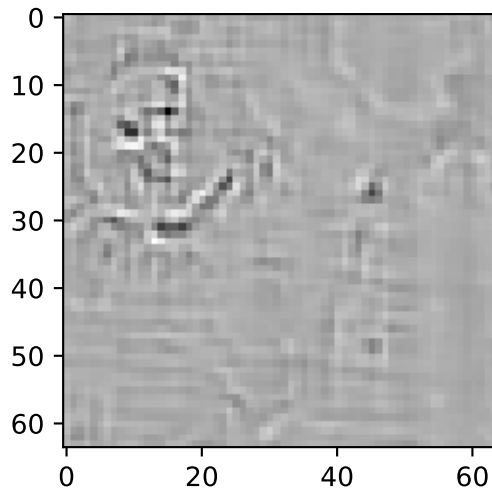

Supplement: supplementary_material [file attachment]

original

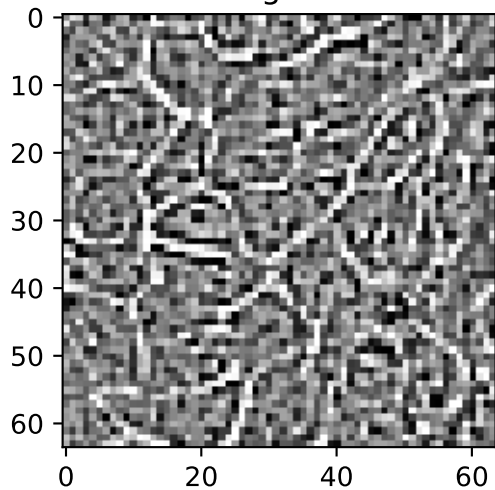

reconstruction

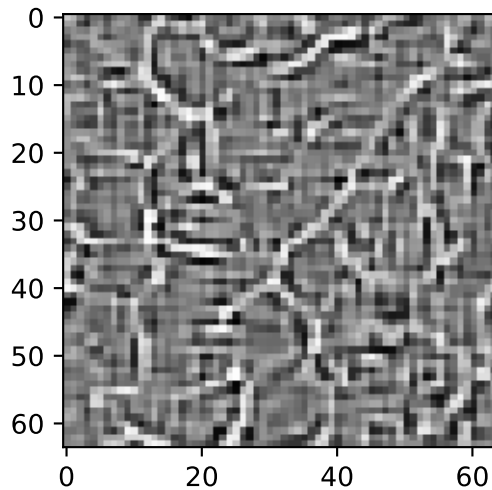

Supplement: supplementary_material [file attachment]

original

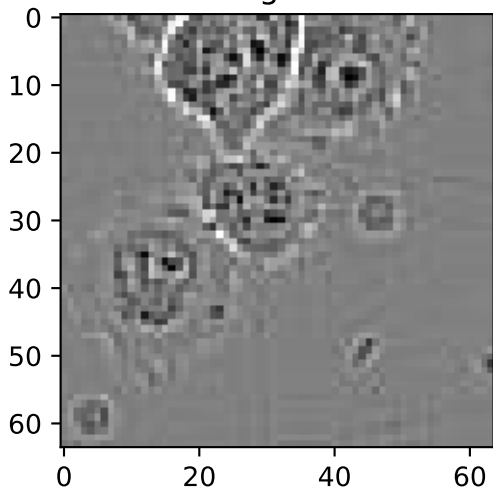

reconstruction

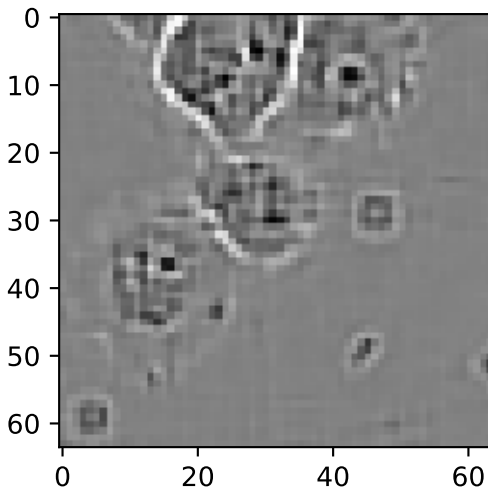

Supplement: supplementary_material [file attachment]

original

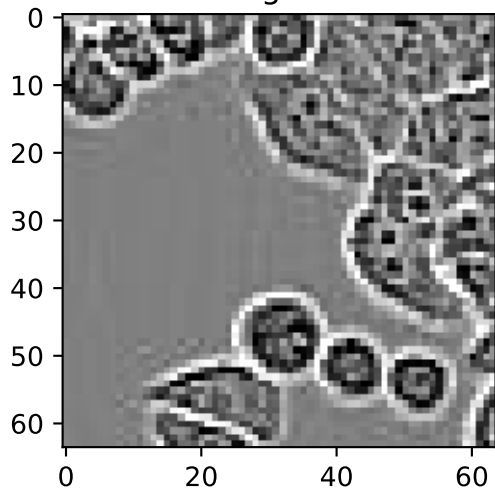

reconstruction

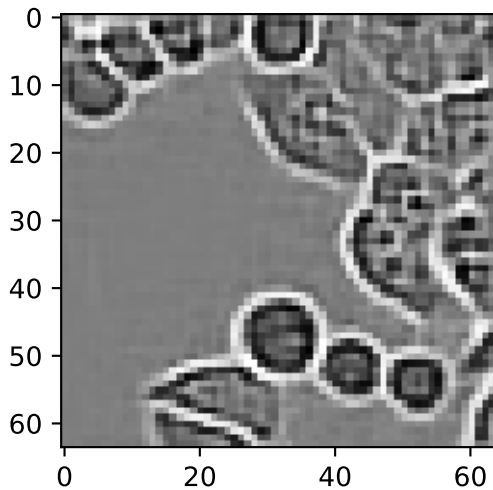

Supplement: supplementary_material [file attachment]

original

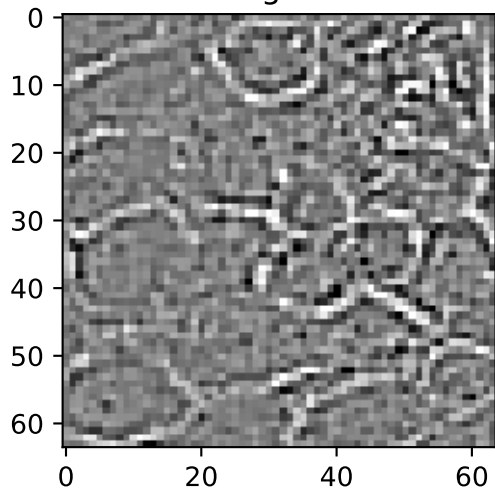

reconstruction

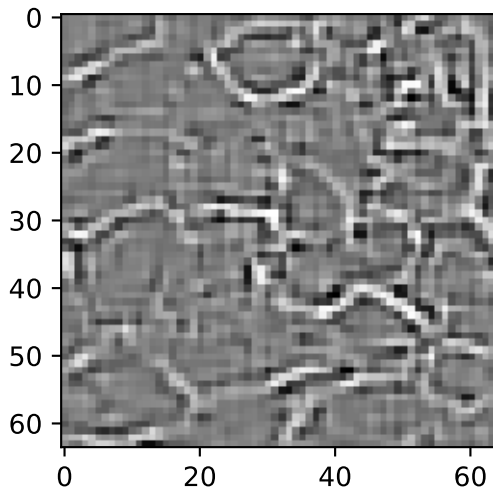

Supplement: supplementary_material [file attachment]

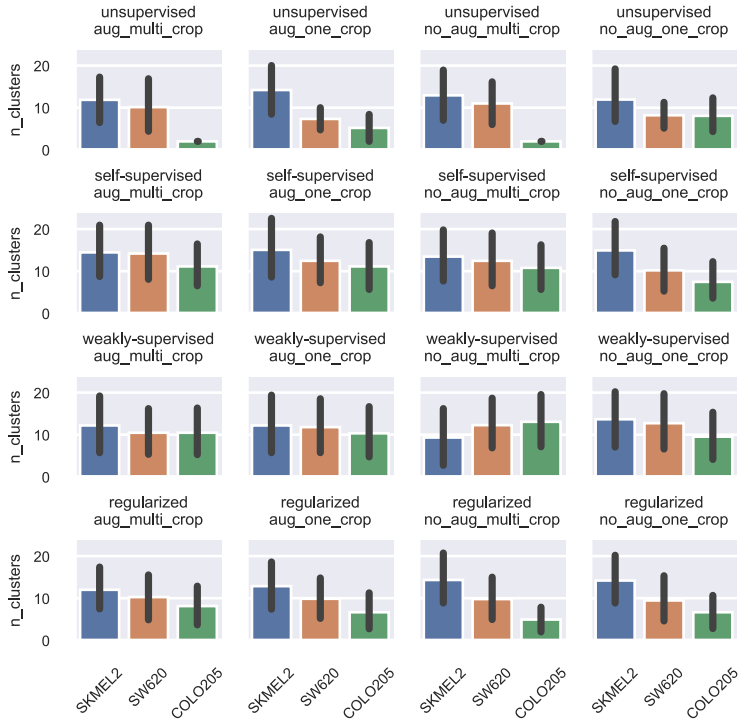

Supplement: supplementary_material [file attachment]

original

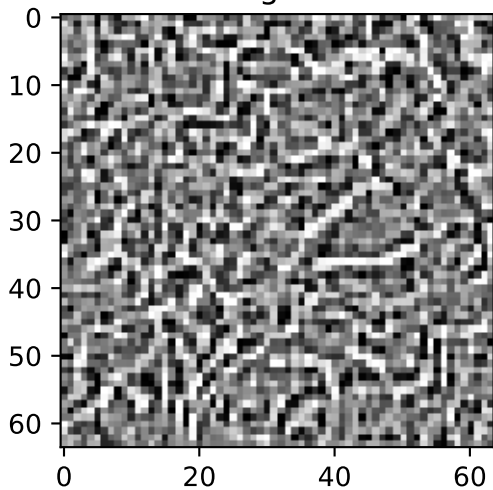

reconstruction

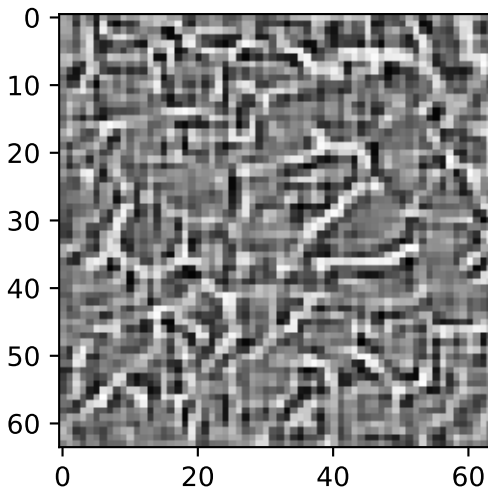

Supplement: supplementary_material [file attachment]
